# Supplementary material for: Not in black or white, encryption of grayscale images by donor–acceptor Stenhouse adducts
Source: Royal Society of Chemistry journal article supplement (doi:10.1039/d3cc04098d), 2023-01-01
Supplement: d3cc04098d1.pdf [file d3cc04098d1.pdf]

## ***Electronic Supplementary Information***

### **Not in black or white, encryption of grayscale images by donor-acceptor Stenhouse adducts**

Fanxi Sun,<sup>†a, b</sup> Ang Gao,<sup>†a, b</sup> Xiaoyu Xiong,<sup>†b</sup> Yongli Duan,<sup>b</sup> Dacheng Dai,<sup>b</sup> Yifei Zhu,<sup>c</sup> Chaoming Xie,<sup>d</sup> Qiang Wei,<sup>e</sup> Longquan Chen,<sup>f</sup> Bo He,<sup>g</sup> Hui Zhao,<sup>h</sup> Yonghao Zheng,<sup>b</sup> Xu Deng,<sup>i</sup> Chen Wei<sup>\*b</sup> and Dongsheng Wang<sup>\*a, b</sup>

- a. Yangtze Delta Region Institute (Huzhou), University of Electronic Science and Technology of China, Huzhou 313001, China E-mail: wangds@uestc.edu.cn
- b. School of Optoelectronic Science and Technology, University of Electronic Science and Technology of China, Chengdu 610054, China
- c. The Experimental High School Attached to UESTC, Chengdu 611730, P. R. China
- d. Institute of Biomedical Engineering, College of Medicine, Southwest Jiaotong University, Chengdu 610031, Sichuan, China
- e. State Key Laboratory of Polymer Materials and Engineering, College of Polymer Science and Engineering, Sichuan University, Chengdu 610065, China
- f. School of Physics, University of Electronic Science and Technology of China, Chengdu, 610054 P. R. China
- g. LONGi Green Energy Technology Co., Ltd., Xi'an 710016, China
- h. School of Chemical Engineering, Sichuan University, Chengdu 610065, China
- i. Institute of Fundamental and Frontier Science, University of Electronic Science and Technology of China, Chengdu 610054, China

# Contents

|                                                                                       |           |
|---------------------------------------------------------------------------------------|-----------|
| <b>1. Experimental section</b> .....                                                  | <b>3</b>  |
| 1.1. Material.....                                                                    | 3         |
| 1.2. Characterizations methods.....                                                   | 3         |
| 1.3. Synthesis of DASA-MA .....                                                       | 4         |
| <b>2. Photoisomerization of DASAs in solvents</b> .....                               | <b>6</b>  |
| <b>3. Photoisomerization of DASAs on the paper surfaces</b> .....                     | <b>8</b>  |
| <b>4. DFT calculations</b> .....                                                      | <b>11</b> |
| <b>5. Interrelationship between DFT calculations and isomerization kinetics</b> ..... | <b>12</b> |
| <b>6. Solvatochromism of DASA-MA</b> .....                                            | <b>14</b> |
| <b>7. Photoisomerization of DASA-MA on the PMMA pretreated paper surfaces</b> ...     | <b>17</b> |
| <b>8. Image processing for grayscale printing</b> .....                               | <b>18</b> |
| <b>9. Grayscale printing of GTA on PMMA pretreated DASA paper</b> .....               | <b>24</b> |
| <b>10. The relationships between grayscale bit depth and clarity</b> .....            | <b>25</b> |
| <b>11. The reversible isomerization of DASA-MA</b> .....                              | <b>26</b> |
| <b>12. Crystal structure data for DASA-MA</b> .....                                   | <b>28</b> |
| <b>13. NMR data and mass spectrum of DASA-MA</b> .....                                | <b>34</b> |
| <b>14. References</b> .....                                                           | <b>36</b> |
| <b>15. Calculated geometries:</b> .....                                               | <b>37</b> |

## 1. Experimental section

### 1.1. Material

All the chemicals and reagents were commercially obtained and used without further purification. 2-furaldehyde (C<sub>5</sub>H<sub>4</sub>O<sub>2</sub>, CAS No. 98-01-1), N-propylaniline (C<sub>9</sub>H<sub>13</sub>N, CAS No. 622-80-0), Glycerol triacetate (GTA) (C<sub>9</sub>H<sub>14</sub>O<sub>6</sub>, CAS No. 102-76-1), was purchased from the Aladdin Chemicals. Hexyl benzoate (HB) (C<sub>13</sub>H<sub>18</sub>O<sub>2</sub>, CAS No. 6789-88-4), Hexyl hexanoate (HH) (C<sub>12</sub>H<sub>24</sub>O<sub>2</sub>, CAS No. 6378-65-0), Triethylene glycol diacetate (TGD)(C<sub>10</sub>H<sub>18</sub>O<sub>6</sub>, CAS No. 111-21-7), Polymethyl methacrylate (PMMA) ((C<sub>5</sub>H<sub>8</sub>O<sub>2</sub>)<sub>n</sub>,  $M_n=800000$  g/mol, CAS No. 9011-14-7), were purchased from Macklin. Ethanol (C<sub>2</sub>H<sub>6</sub>O, CAS No. 64-17-5) Tetrahydrofuran (THF)(C<sub>4</sub>H<sub>8</sub>O, CAS No. 109-99-9), Acetonitrile (C<sub>2</sub>H<sub>3</sub>N, CAS No. 75-05-8) and methylene dichloride (DCM) (CH<sub>2</sub>Cl<sub>2</sub>, CAS No. 75-09-2) were purchased from Chengdu Keshi Reagent. Milli-Q water (resistivity: 18.2 MΩ×cm) was used throughout the project.

### 1.2. Characterizations methods

UV-vis spectra (including absorbance and reflectance) were recorded on a Shimadzu UV-2600 spectrophotometer. For the determination of the kinetics of isomerization between *linear* and *cyclic* donor-acceptor Stenhouse adducts (DASAs), the absorbance (reflectance) value at a typical wavelength was recorded to obtain precise results. The content of *cyclic* isomers was calculated as described in **section 3**.

Density functional theory (DFT) calculation was used to understand the relative pKa and molecular energy variation during the isomerization between *linear* and *cyclic* DASAs. Moreover, the length of the intramolecular hydrogen bond was calculated under surrounding functional molecules. These were described in detail in **section 4**.

For the controlling of isomerization between *linear* and *cyclic* DASAs, light-emitting diodes (LED) systems generating 520 nm green light was used to induce the *linear-to-cyclic* isomerization of DASAs in solutions, on paper surfaces (Zhongjiao Jinyuan Systems). The output intensity of the

LED was controlled by an LED controller (Zhongjiao Jinyuan Systems) and calibrated by a Laserpoint calibrator (A-02-D12-BBF). A uniformly exposed LED white light (10,000) was used for recording videos in Fig. 3 and Supplementary videos 1-4.

For the printing of ester-contained invisible inks dissolved in EtOH, a commercial ink-jet printer (EPSON L130) was used.

### 1.3. Synthesis of DASA-MA

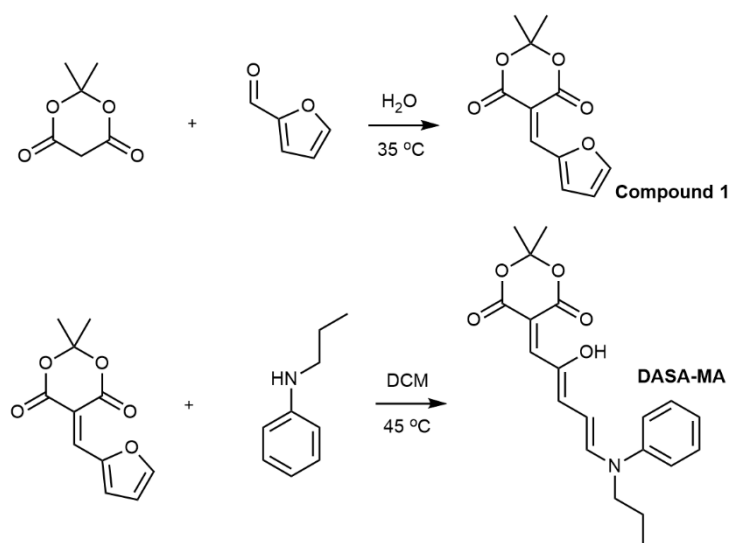

**Scheme S1.** Synthetic route for **DASA-MA**

*Synthesis of DASA-MA.* Synthesis of DASAs is according to previous reports without modifications.<sup>1, 2</sup> 2,2-dimethyl-1,3-dioxane-4,6-dione (1 g, 6.93 mmol) was completely dissolved into 20 mL distilled water under stirring. 2-furaldehyde (666.62 mg, 6.93 mmol) was slowly dropped into the solution. Then, the solution was heated to 35 °C and kept for 2 h, which formed a yellow solid. The yellow solid was collected by vacuum filtration, followed by washing with distilled water for several times. The solid was then dissolved into 50 mL methylene dichloride and washed by 50 mL saturated NaCl aqueous solution. The organic layer was purified by column chromatography, and obtained a yellow solution which was then condensed by rotary evaporation to give 1.233 g yellow product (Yield: 95 %). The yellow product (300 mg, 1.35 mmol) was dissolved into 20 mL DCM,

followed by slowly adding N-Propylaniline (182 mg, 1.35 mmol) under stirring. After stirring at 40 °C for 2 h, the solution turned to deep purple. The mixture was then condensed by rotary evaporation and further purified by column chromatography to give 289 mg (Yield: 60 %) deep purple solid **DASA-MA**. Crystal structure data for **DASA-MA** can be obtained free of charge from the Cambridge Crystallographic Data Centre via [www.ccdc.cam.ac.uk/data\\_request/cif](http://www.ccdc.cam.ac.uk/data_request/cif) CCDC# 2258697

## 2. Photoisomerization of DASAs in solvents

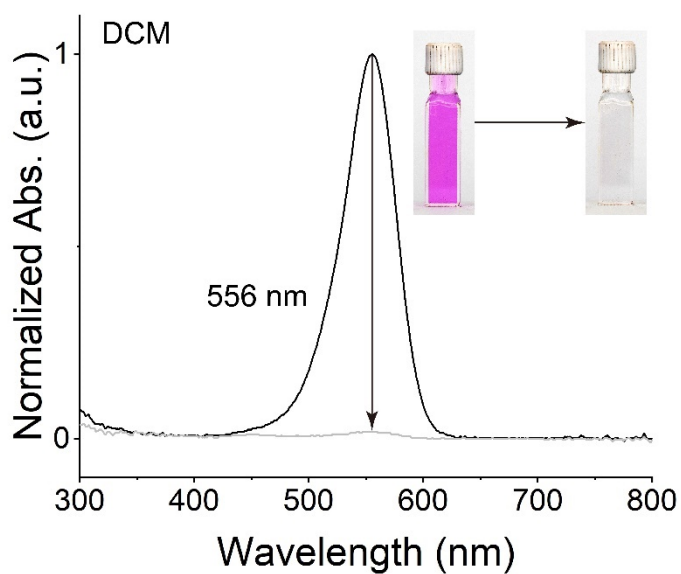

**Fig. S1.** Normalized UV-Vis absorption spectra of **DASA-MA** before and after green light irradiation (520 nm, 40 mW/cm<sup>2</sup>, 1 min) in DCM. Inner shows the photographic images before and after green light irradiation.

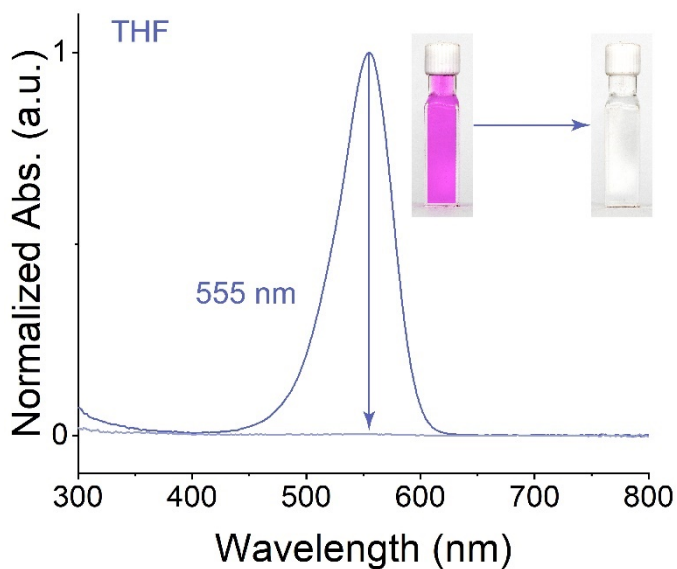

**Fig. S2.** Normalized UV-Vis absorption spectra of **DASA-MA** before and after green light irradiation (520 nm, 40 mW/cm<sup>2</sup>, 1 min) in THF. Inner shows the photographic images before and after green light irradiation.

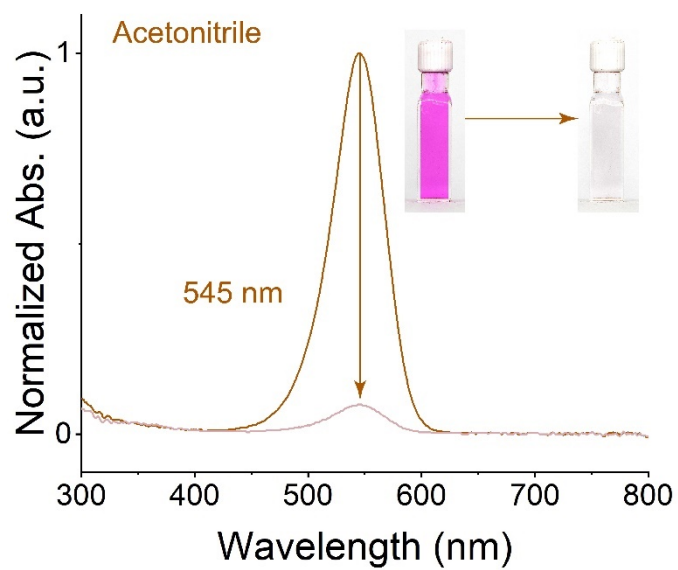

**Fig. S3.** Normalized UV-Vis absorption spectra of **DASA-MA** before and after green light irradiation (520 nm, 40 mW/cm<sup>2</sup>, 1 min) in acetonitrile. Inner shows the photographic images before and after green light irradiation.

### 3. Photoisomerization of DASAs on the paper surfaces

The isomerization of **DASA-MA** on the paper surfaces under the promotion of ester-contained molecules was investigated by impregnation treatment. For example, to investigate the promotion by **GTA**, four 100 mL portions of 1 mg/mL **DASA-MA/DCM** solution were prepared, the amount of **DASA-MA** in each portion of the solution was 100 mg, followed by adding 0 mg, 100 mg, 200 mg, and 500 mg of **GTA** sequentially to the solution, and followed by impregnating the papers to the above solution for 30 s and dried in the dark at room temperature for 3 min. The samples were named 0, 1, 2 and 5, respectively, based on the mass ratio of **GTA:DASA-MA**.

Due to each scanning process taking 85 s, the real-time counting method was used to capture the peak reflectance, to get the reflectance at a specific time ( $R_t$ ), DASAs in *cyclic* do not absorb in the visible light region,<sup>3-6</sup> therefore, the *linear-to-cyclic* isomerization induces the increase in reflectance. Therefore, the portion of *cyclic* DASAs at any given time ( $C_t$ ) was obtained by the following equation.

$$C_t = \frac{R_{0s} - R_t}{R_{paper} - R_{0s}} \times 100\% \quad (1)$$

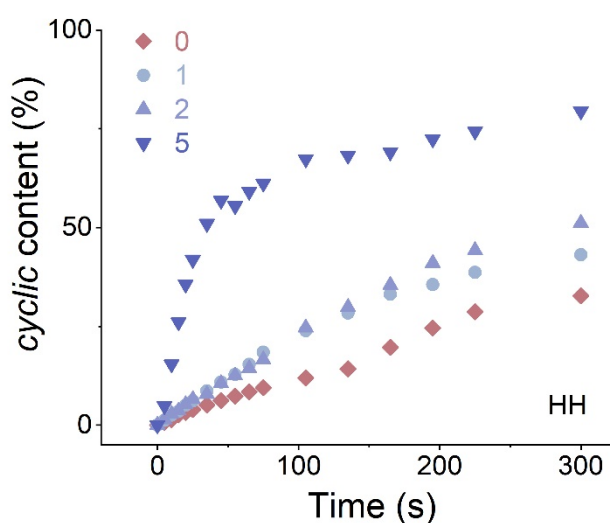

**Fig. S4.** Time-dependent *linear-to-cyclic* (520 nm, 40 mW/cm<sup>2</sup>) isomerization of **DASA-MA** on the paper surface using **HH** as the additives (**HH/DASA-MA** = 0-5 in weight ratio).



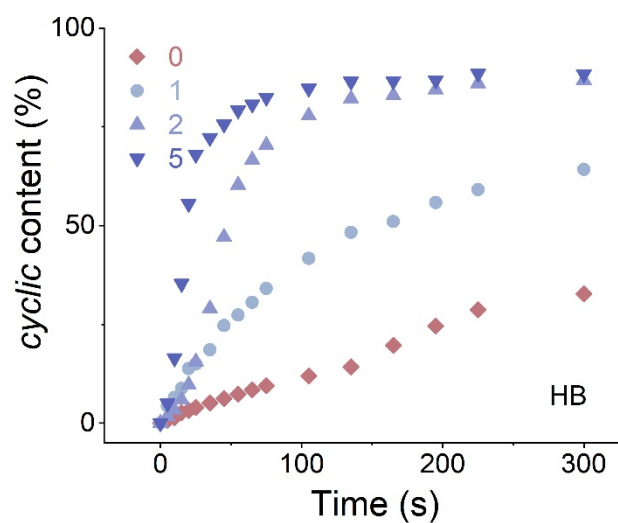

**Fig. S5.** Time-dependent *linear-to-cyclic* (520 nm, 40 mW/cm<sup>2</sup>) isomerization of **DASA-MA** on the paper surface using **HB** as the additives (**HB/DASA-MA** = 0-5 in weight ratio).

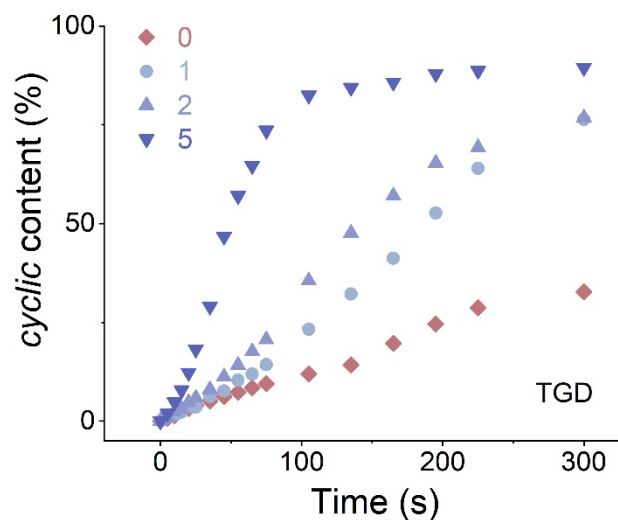

**Fig. S6.** Time-dependent *linear-to-cyclic* (520 nm, 40 mW/cm<sup>2</sup>) isomerization of **DASA-MA** on the paper surface using **TDG** as the additives (**TDG/DASA-MA** = 0-5 in weight ratio).

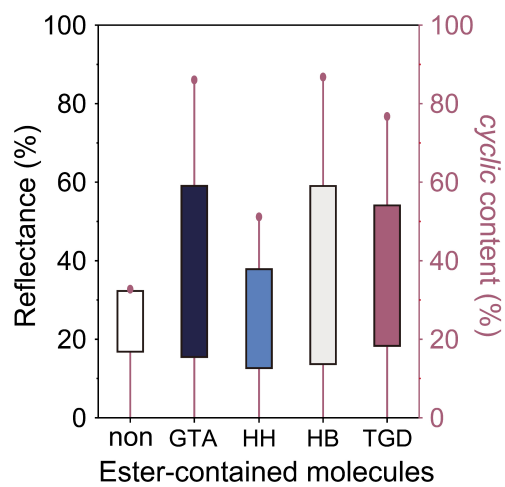

**Fig. S7.** Summarization of reflectance changes (left, %) and *cyclic* content (right, %) of **DASA-MA** with or without the promotion of 2 mg/mg (**Ester-contained molecules/DASA-MA**) under 40 mW/cm<sup>2</sup> 520 nm irradiation for 300 s.

## 4. DFT calculations

Geometry optimizations were performed with the Gaussian 16 program suite<sup>7</sup> using the density functional theory (DFT) with the B3LYP(D3) exchange-correlational functionals<sup>8</sup> and employing the TZVP basis set for all atoms.<sup>9, 10</sup> The obtained stationary points were characterized by frequency calculations. The calculated geometries were shown in **section 14**.

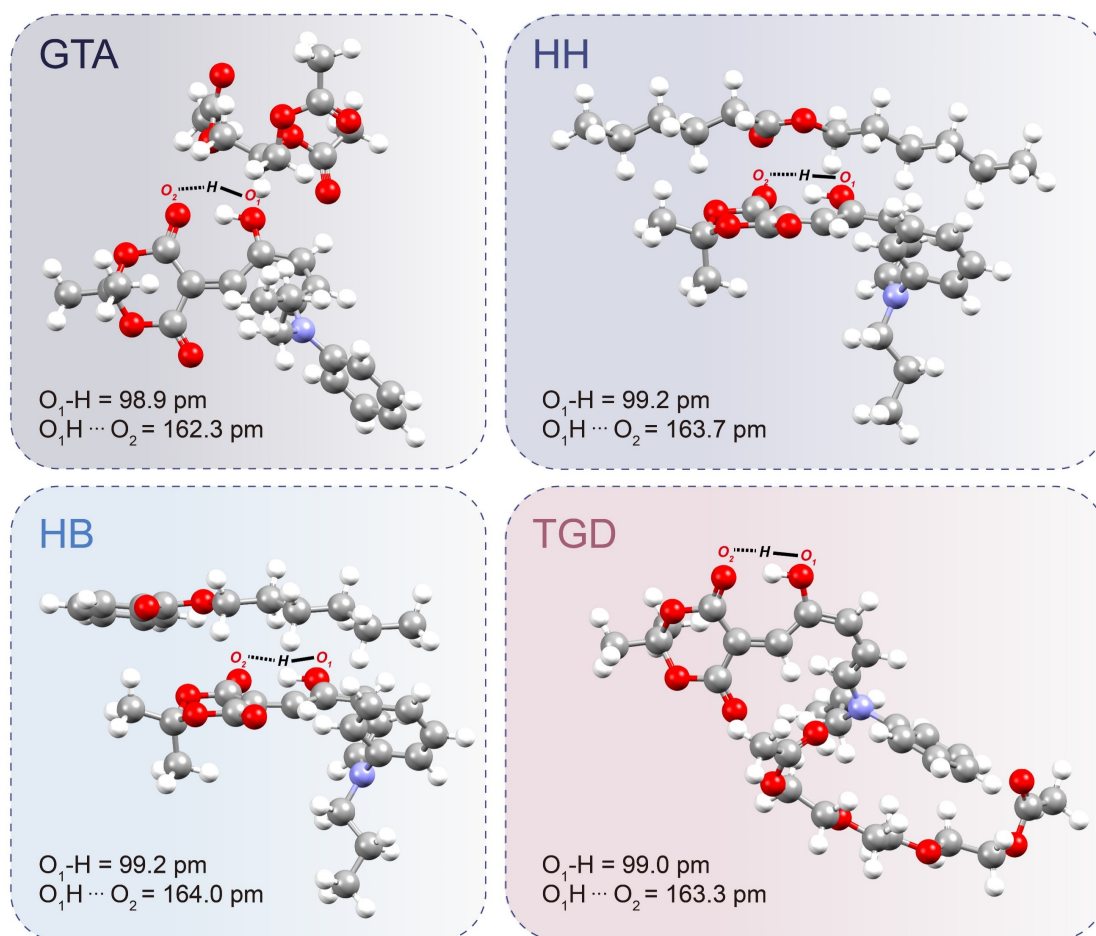

**Fig. S8.** Schematic illustration of the calculated molecular structure of **DASA-MA** in the A'' state surrounded by **GTA**, **HH**, **HB** and **TGD**.

## 5. Interrelationship between DFT calculations and isomerization kinetics

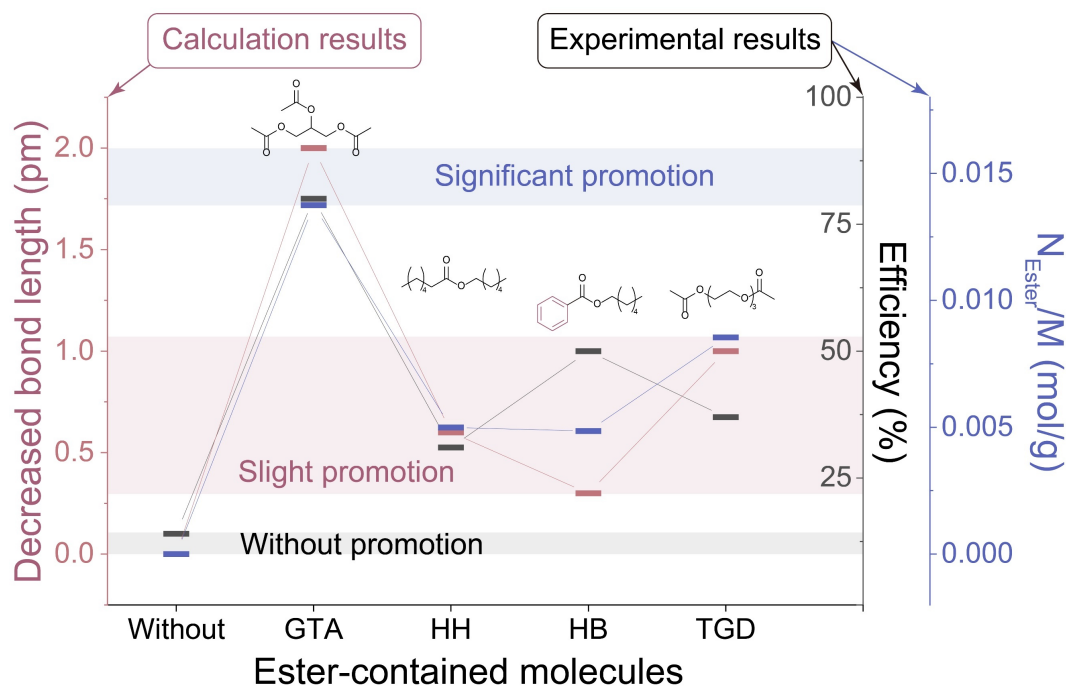

**Fig. S9.** Calculated decreased length of the intramolecular hydrogen bond of **DASA-MA** with various esters (left red axis); the *linear-to-cyclic* isomerization efficiency of **DASA-MA** with various esters (1:1 in weight ratio) after irradiation at 520 nm (40 mW/cm<sup>2</sup>) for 150 s (right black axis); calculated  $N_{\text{Ester}}/M$  of various esters (right blue axis).

Five main intermediates are involved during the *linear-to-cyclic* photoisomerization of **DASA-MA** (Fig. 2a). The intramolecular proton transfer from the hydroxyl group on the triene  $\pi$ -bridge to the carbonyl group on the electron-withdrawing moiety is critically important for the cyclization<sup>1</sup>. Therefore, the length of the intramolecular hydrogen bond closely affects the proton transfer.

The calculated intramolecular hydrogen bond length follows the order of **GTA** < **TGD** < **HH** < **HB**, which was inferred based on well-established principles and assumptions. However, the theoretical predictions are based on simplified models and may not capture all the complexities of

real-world systems. A more in-depth analysis was conducted based on the contents of ester groups of the additives with the same weight.

Adding esters obviously decreases the hydrogen bond length as well as promoting the photoisomerization (Fig. S9). The promoting effect could be categorized into three stages: (1) In the absence of additives (bond length of ~164.3 pm), only ~14% *linear* **DASA-MA** isomerize to *cyclic* after 520 nm green light irradiation (40 mW/cm<sup>2</sup>) for 150 s (grey region in Fig. S9); (2) Adding **GTA** decreases the hydrogen bond length by 2 pm, and the *linear-to-cyclic* transition efficiency sharply reaches ~80% (blue region in Fig. S9); (3) The other additives (**TGD**, **HH** and **HB**) decreased the hydrogen bond length by 0.3-1 pm promote the *linear-to-cyclic* transition efficiency to 30-50% (red region in Fig. S9). Therefore, the promoting effect of the photoisomerization exhibits semi-quantitative interrelationship with the decreased value of hydrogen bond length.

In the experiments, the amount of ester-containing additives was determined based on the mass ratio. However, it's important to note that each additive contains a varying number of ester groups as well as a distinct relative molecular mass. To further quantitatively investigate the relationship between experimental and simulation results, the  $N_{Ester}/M$  (the amount of the ester groups divided by corresponding molecular weight) was considered, indicating the molar quantity of ester groups on the additives with equal weight (Equation S1).

$$\frac{N_{Ester}}{M} = \frac{m}{M} \times N_{Ester} \quad S1$$

where  $N_{Ester}$  indicates the number of ester groups on each molecule;  $M$  represents the molecular weight;  $m$  represents the mass of the additives.

**GTA** with 3 ester groups shows the highest value of  $N_{Ester}/M$  (~0.013), indicating the strongest contribution of esters (blue line in Fig. S9). On the contrary, **TGD**, **HB** and **HH** with 1 or 2 ester groups exhibit lower values of  $N_{Ester}/M$ . These are in good accordance with the results of promoting effect of photoisomerization of **DASA-MA**. Therefore, both the length of intramolecular hydrogen bond and the content of ester groups affect the *linear-to-cyclic* isomerization of **DASA-MA**.

## 6. Solvatochromism of DASA-MA

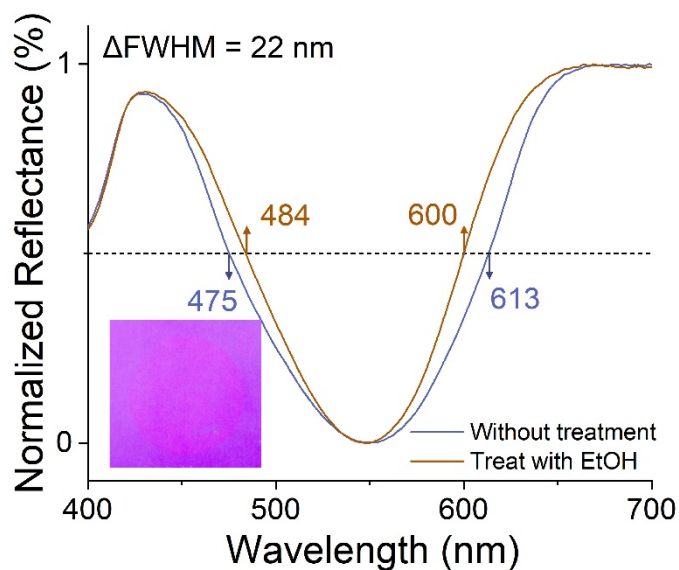

**Fig. S10.** Normalized reflectance spectra of paper after impregnation in 1 mg/mL **DASA-MA/DCM** solution (blue) and printed with 300 mg/mL **GTA/EtOH** ink (red). Inner show the images of the area with (inner circle) and without (outside the circle) **GTA/EtOH** ink,

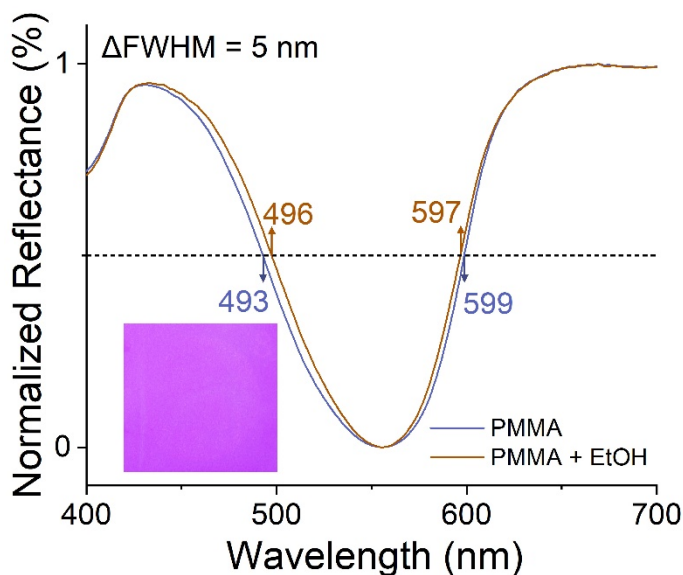

**Fig. S11.** Normalized reflectance spectra of paper after impregnation in 1 mg/20 mg/mL **DASA-MA/PMMA/DCM** solution (blue) and printed with 300 mg/mL **GTA/EtOH** ink (red). Inner show the images of the area with (inner circle) and without (outside the circle) **GTA/EtOH** ink.

The boiling point of **GTA** is 258-260 °C. Therefore, **GTA** is deposited on paper surface after printing, which promotes the *linear-to-cyclic* isomerization of **DASA-MA**. The reflectance spectra of **DASA-MA** on paper surface with and without the addition of **GTA** (1 mg/mL) were compared (Fig. S12). The addition of **GTA** does not lead to any significant changes in the reflectance spectra. Nevertheless, upon the addition of **PMMA**, there is an increase of reflectance between 200-300 nm, and a notable reduction of the full width at half maximum (FWHM) of the reflectance in visible light region. Therefore, the intermolecular interaction between **GTA** and **DASA-MA** might be too weak to be recognized by reflectance spectra.

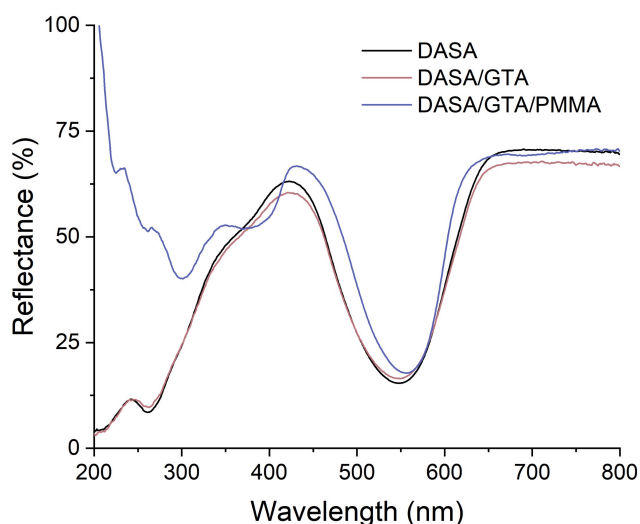

**Fig. S12.** Reflectance spectra of paper treated with **DASA-MA/DCM** = 1 mg/1 mL (black), **DASA-MA/GTA/DCM** = 1 mg/1 mg/1 mL (red) and **DASA-MA/GTA/PMMA** = 1 mg/1 mg/20 mg/1 mL (blue) solutions.

The chemistry on paper surface was monitored by ATR-FTIR spectroscopy. After immersing the paper in a 1 mg/mL **DASA-MA** solution, there were no significant changes between  $\sim 1600$ - $1000$   $\text{cm}^{-1}$ . Peaks attributed to the vibration of benzene rings and double bonds on the triene  $\pi$ -bridge of **DASA-MA** are observed in the fingerprint region at  $\sim 825$ - $710$   $\text{cm}^{-1}$  (Fig. S13). After introducing **GTA**, a broad peak at  $\sim 1647$   $\text{cm}^{-1}$  emerges due to the vibration of C=O of ester groups (Fig. S13).

Finally, with the introduction of **PMMA**, a distinct peak at  $\sim 1733\text{ cm}^{-1}$  appears due to the vibration of C=O (Fig. S13). Due to the weak signals of ATR-FTIR spectra, it is difficult to recognize the intermolecular interaction between the molecules.

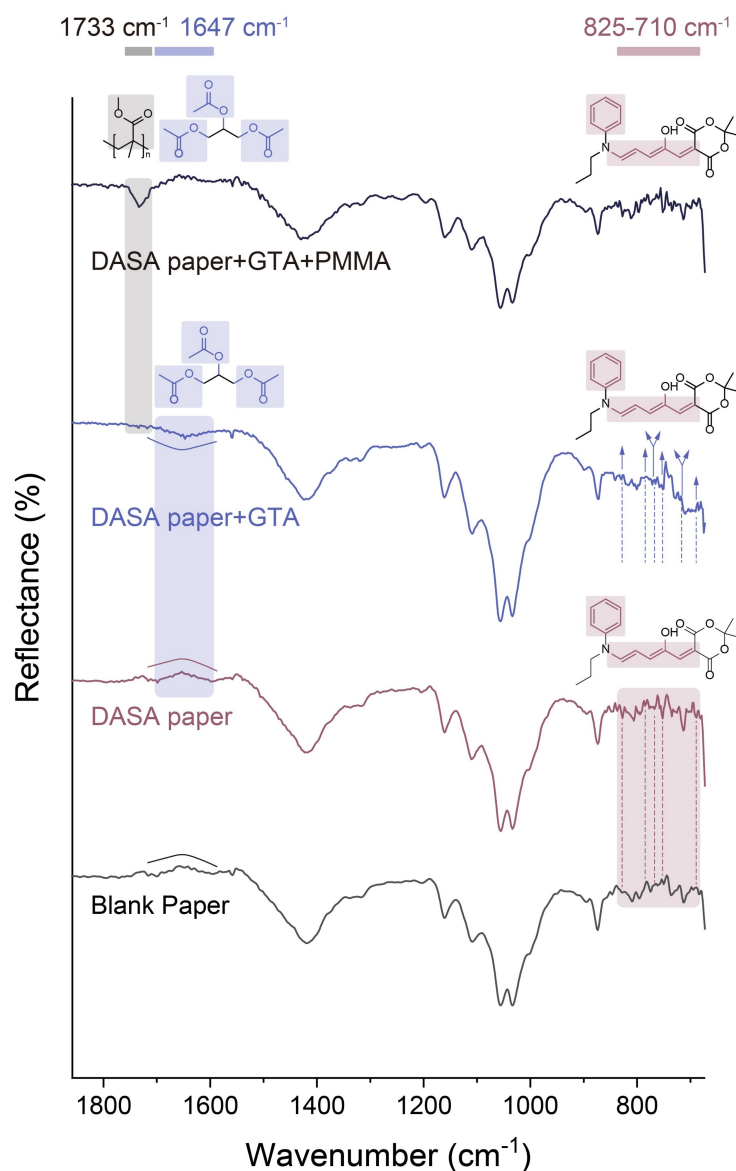

**Fig. S13.** ATR-FTIR spectra of pure paper (black), paper treated with **DASA-MA/DCM** = 1 mg/1 mL (red), **DASA-MA/GTA/DCM** = 1 mg/1 mg/1 mL (blue) and **DASA-MA/GTA/PMMA** = 1 mg/1 mg/20 mg/1 mL (gray) solutions.



## 7. Photoisomerization of DASA-MA on the PMMA pretreated paper surfaces

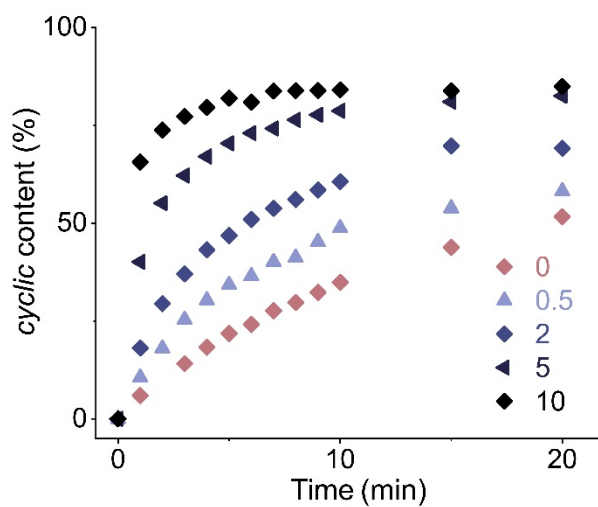

**Fig. S14.** Time-dependent *linear-to-cyclic* (520 nm, 40 mW/cm<sup>2</sup>) isomerization of **DASA-MA** on PMMA pretreated paper surfaces using **GTA** as the additives (**GTA/DASA-MA** = 0-10 in weight ratio).

## 8. Image processing for grayscale printing

First, the specified image (**Fig. S16**) is converted from an RGB image to a gray image in MATLAB using the following code,

```
rgbImage = imread('image.jpg');  
grayImage = rgb2gray(rgbImage);  
imshow(grayImage);
```

The above image was then converted grayscale image to 1, 2, 4 bit representation (**Scheme 1a**) in MATLAB through code,

```
gray_img(gray_img <= 127) = 0;  
gray_img(gray_img > 127) = 255;  
imshow(gray_img);  
imwrite(gray_img, '1bit.jpg', 'jpg');  
gray_img(gray_img <= 42) = 0;  
gray_img(gray_img > 42 & gray_img <= 127) = 85;  
gray_img(gray_img > 128 & gray_img <= 213) = 170;  
gray_img(gray_img > 213) = 255;  
imshow(gray_img);  
imwrite(gray_img, '2bit.jpg', 'jpg');  
  
ray_img(gray_img <= 7) = 0;  
gray_img(gray_img >= 7 & gray_img <= 23) = 15;  
gray_img(gray_img > 23 & gray_img <= 39) = 31;  
gray_img(gray_img >= 39 & gray_img <= 55) = 47;  
gray_img(gray_img > 55 & gray_img <= 71) = 63;  
gray_img(gray_img >= 71 & gray_img <= 87) = 79;  
gray_img(gray_img > 87 & gray_img <= 103) = 95;  
gray_img(gray_img > 103 & gray_img <= 119) = 111;  
gray_img(gray_img > 119 & gray_img <= 135) = 127;  
gray_img(gray_img > 135 & gray_img <= 151) = 143;  
gray_img(gray_img > 151 & gray_img <= 167) = 159;  
gray_img(gray_img > 167 & gray_img <= 183) = 175;  
gray_img(gray_img > 183 & gray_img <= 199) = 191;
```

```

gray_img(gray_img > 199 & gray_img <= 215) = 207;
gray_img(gray_img > 215 & gray_img <= 231) = 223;
gray_img(gray_img > 231 & gray_img <= 247) = 239;
gray_img(gray_img > 247) = 255;
imshow(gray_img);
imwrite(gray_img,'4bit.jpg','jpg');

```

Before printing, the above mentioned 1-8 bit images need to go through the reverse processing as below (**Fig. S22**),

```

grayImage = imread('grayscale_image.jpg');
invertedImage = 255 - grayImage;
imshow(invertedImage);
imwrite(invertedImage, 'inverted_image.jpg');

```

The code to output the histogram of the gray scale distribution (**Fig. 3c-e, Fig. S24b and S17-S21**) is as follows,

```

clear;clc;
[FileName,FilePath]=uigetfile('*.*jpg;*.png;*.tif;*.img;*.gif;');
str=[FilePath,FileName];
color_image=imread(str);
grayscale_image=rgb2gray(color_image);
imshow(grayscale_image);title('Original Grayscale Image');
histogram = imhist(grayscale_image);
figure;
bar(histogram);
title('Grayscale Histogram');
xlabel('Pixel Intensity');
ylabel('Frequency')

```

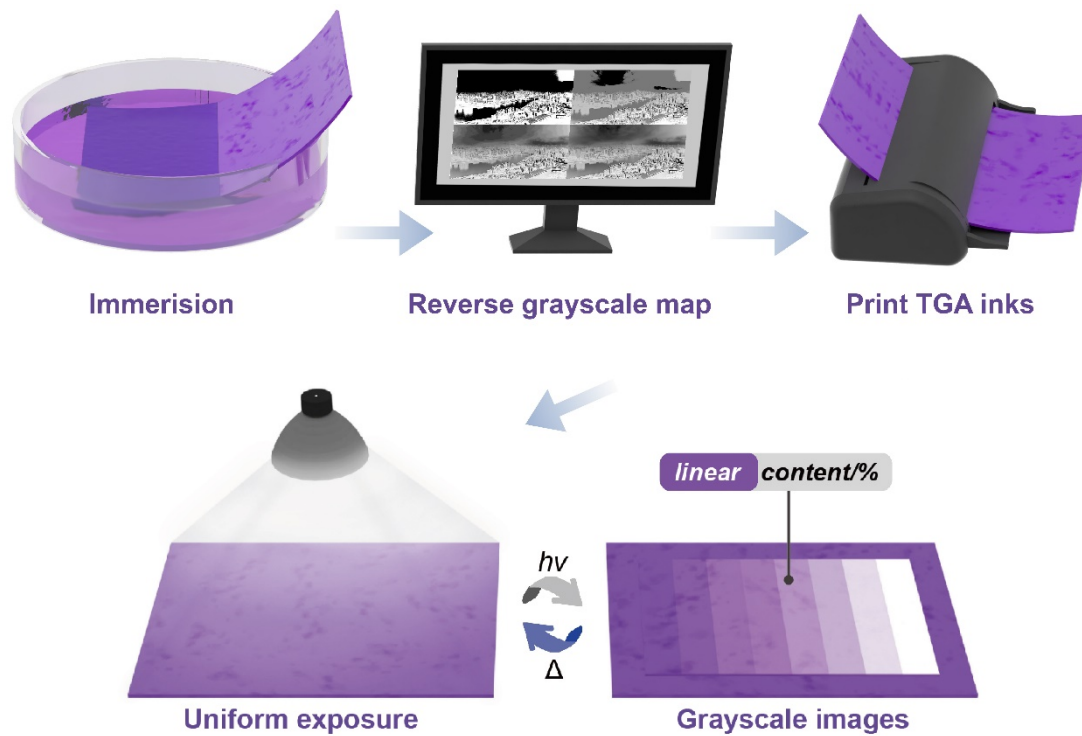

**Fig. S15.** The schematic illustration of grayscale printing.

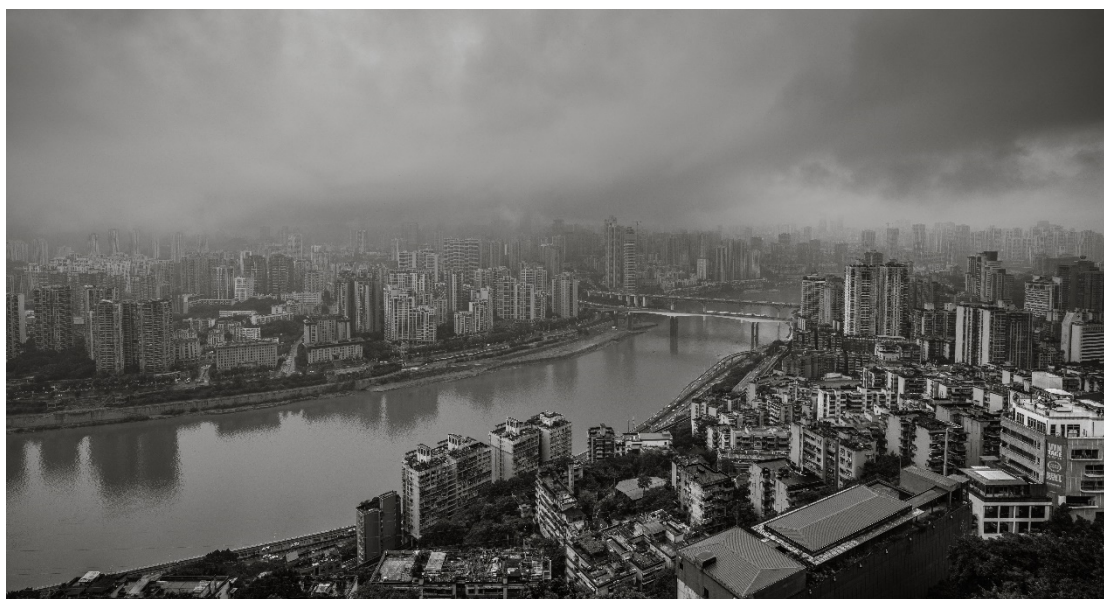

**Fig. S16.** Photographic image of Jialing River (shot by Wang in Chongqing).

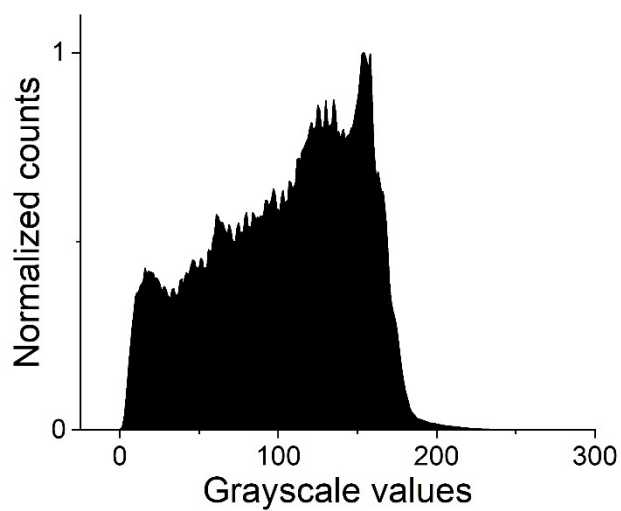

**Fig. S17.** Normalized brightness distributions of the raw image.

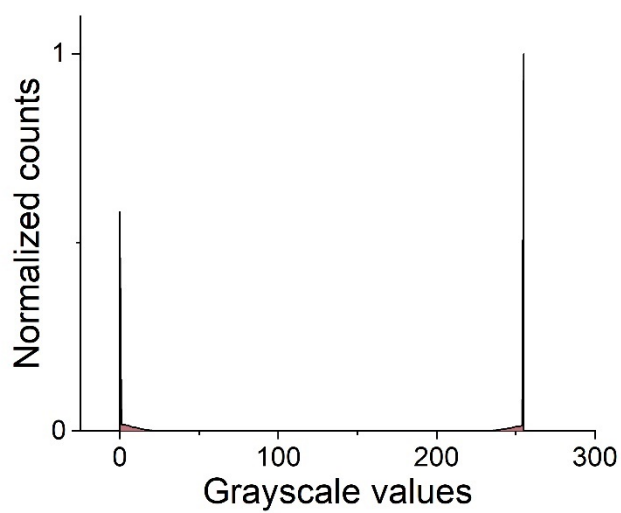

**Fig. S18.** Normalized brightness distributions of the 1-bit image.

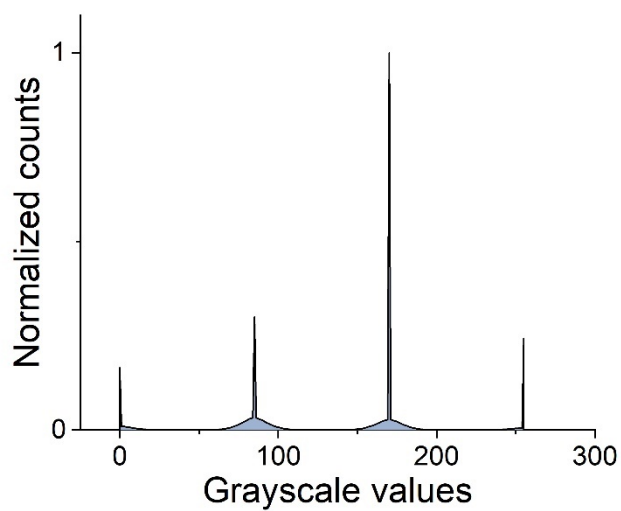

**Fig. S19.** Normalized brightness distributions of the 2-bit image.

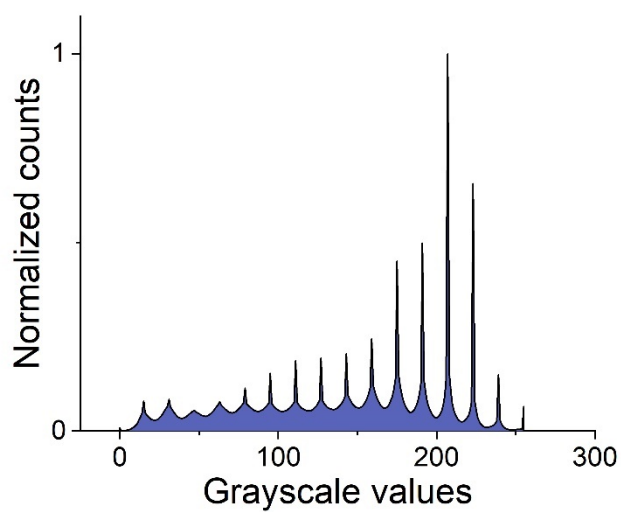

**Fig. S20.** Normalized brightness distributions of the 4-bit image.

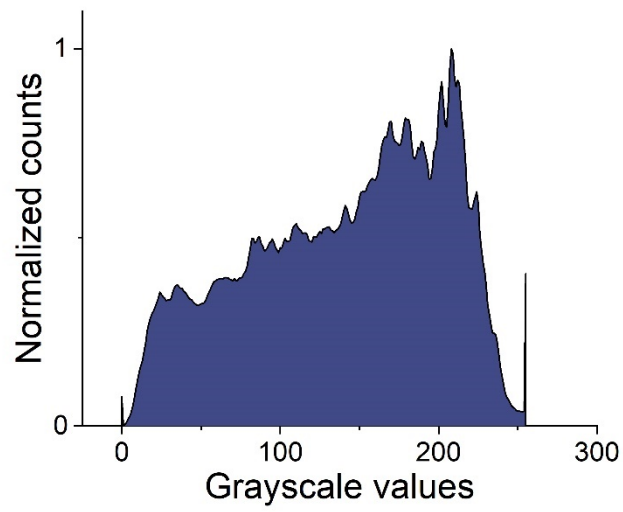

**Fig. S21.** Normalized brightness distributions of the 8-bit image.

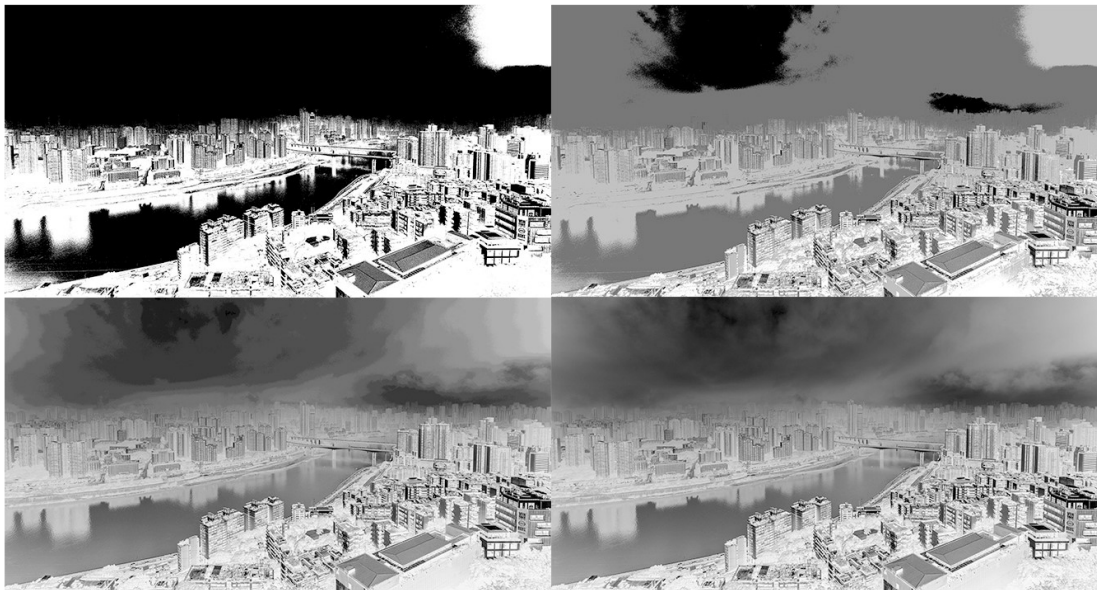

**Fig. S22.** Reversed 1-8 bit grayscale map.

## 9. Grayscale printing of GTA on PMMA pretreated DASA paper

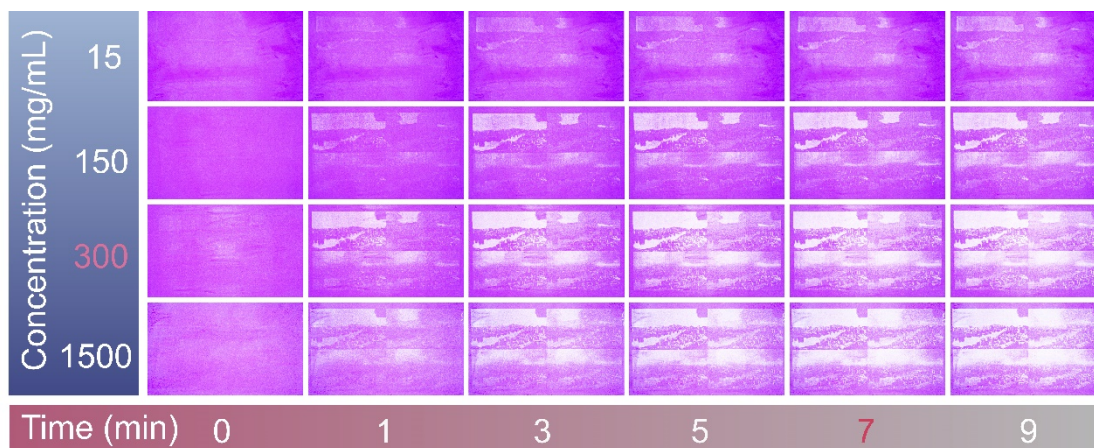

**Fig. S23.** Video screenshots of uniform exposure (10,000 lux) PMMA pretreated (0.02 g/mL) DASA-MA (1 mg/mL) paper printed with 15-1500 mg/mL GTA/EtOH ink at 0-9 min.



## 10. The relationships between grayscale bit depth and clarity

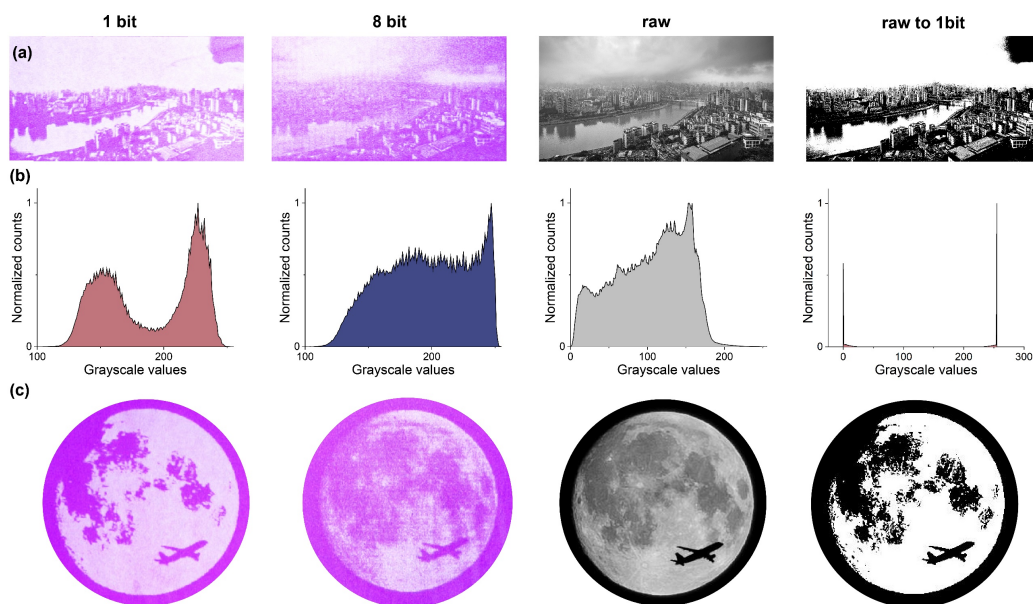

**Fig. S24.** (a) Video screenshots after white light exposure for 7 min and raw images for the 1-bit and 8-bit images, the photographic image of Chongqing was used; (b) Grayscale distribution plots of the video screenshots after white light exposure for 7 min and raw images for the 1-bit and 8-bit images. (c) Video screenshots after white light exposure for 7 min and raw images for the 1-bit and 8-bit images, the photographic image of lunar surface was used.

A trade-off exists between clarity and grayscale depth for the recording of grayscale images. The brightness of the images with low bit depth (1-bit) tends to locate in the lowest and highest regions, which results in a strong visual contrast to preserve the original images' outlines. However, these lead to a loss of grayscale details, such as the cloud formations in Fig. S24a and the brightness variations of lunar surface craters in Fig. S24c. This could be observed in the grayscale distribution, where both 1-bit images exhibit a significant gap between the bright and dark (Fig. S24b). Therefore, with the increase of grayscale depth, more detail could be recorded, while the clarity decreases.

## 11. The reversible isomerization of DASA-MA

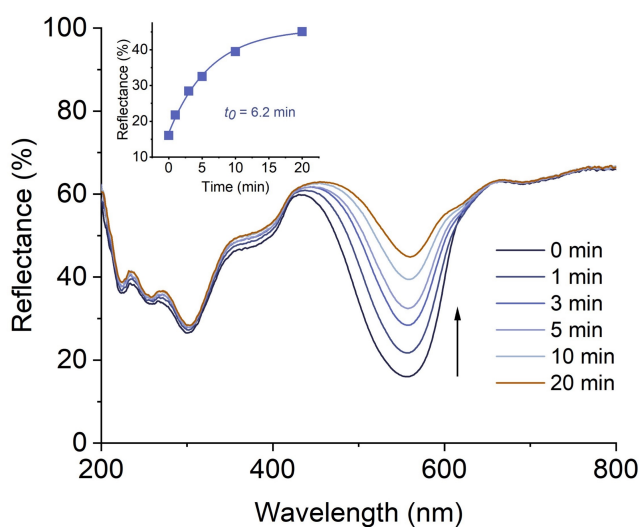

**Fig. S25.** Reflectance spectra of paper impregnated with **DASA-MA/GTA/PMMA/DCM** solution (1 mg/1 mg/20 mg/1 mL) over time upon green light irradiation (520 nm, 40 mW/cm<sup>2</sup>), inner shows the time-dependent *linear-to-cyclic* isomerization of the above sample, the reflectance at 556 nm was monitored.

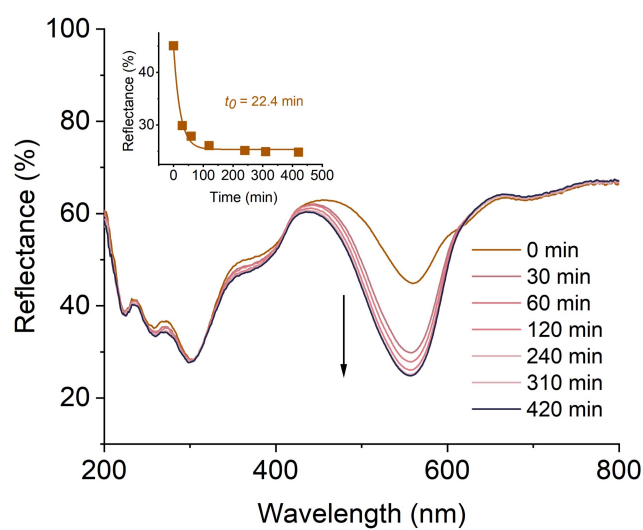

**Fig. S26.** Reflectance spectra of paper impregnated with **DASA-MA/GTA/PMMA/DCM** solution (1 mg/1 mg/20 mg/1 mL) over time under dark, the paper was pre-treated by 20 min green light irradiation (520 nm, 40 mW/cm<sup>2</sup>), inner shows the time-dependent *cyclic-to-linear* isomerization of the above sample, the reflectance at 556 nm was monitored.

## 12. Crystal structure data for DASA-MA

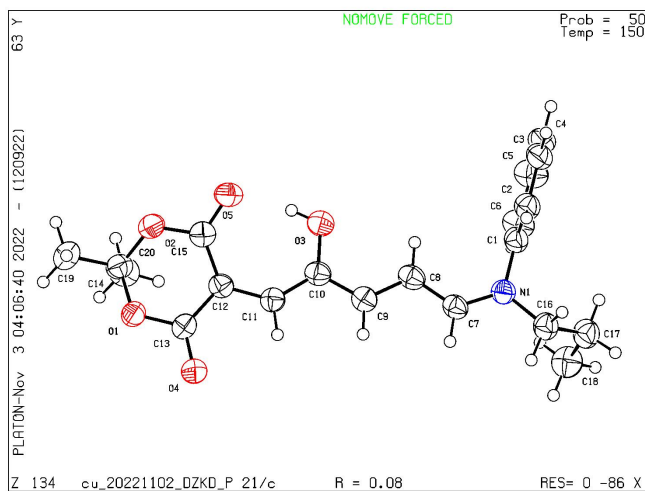

**Fig. S27.** Crystal structure data for **DASA-MA** could be obtained free of charge from the Cambridge Crystallographic Data Centre via [www.ccdc.cam.ac.uk/data\\_request/cif](http://www.ccdc.cam.ac.uk/data_request/cif) CCDC# 2258697.

**Table S1.** Crystal data and structure refinement for **DASA-MA**.

|                                           |                                                 |
|-------------------------------------------|-------------------------------------------------|
| CCDC number                               | 2258697                                         |
| Empirical formula                         | C <sub>20</sub> H <sub>23</sub> NO <sub>5</sub> |
| Formula weight                            | 357.39                                          |
| Temperature [K]                           | 150(2)                                          |
| Crystal system                            | monoclinic                                      |
| Space group (number)                      | <i>P</i> 2 <sub>1</sub> / <i>c</i> (14)         |
| <i>a</i> [Å]                              | 9.87(3)                                         |
| <i>b</i> [Å]                              | 24.42(4)                                        |
| <i>c</i> [Å]                              | 7.70(2)                                         |
| $\alpha$ [°]                              | 90                                              |
| $\beta$ [°]                               | 98.161(17)                                      |
| $\gamma$ [°]                              | 90                                              |
| Volume [Å <sup>3</sup> ]                  | 1838(7)                                         |
| <i>Z</i>                                  | 4                                               |
| $\rho_{\text{calc}}$ [gcm <sup>-3</sup> ] | 1.292                                           |
| $\mu$ [mm <sup>-1</sup> ]                 | 0.763                                           |
| <i>F</i> (000)                            | 760                                             |
| Crystal size [mm <sup>3</sup> ]           | 0.200×0.100×0.100                               |
| Crystal colour                            | red                                             |
| Crystal shape                             | block                                           |
| Radiation                                 | CuK $\alpha$ ( $\lambda$ =1.54184 Å)            |
| 2 $\theta$ range [°]                      | 7.24 to 133.50 (0.84 Å)                         |
| Index ranges                              | -11 ≤ <i>h</i> ≤ 11                             |
| Reflections collected                     | 10742                                           |
| Independent reflections                   | 3228                                            |
| Completeness to                           | 99.2 %                                          |
| Data / Restraints /                       | 3228/0/239                                      |
| Goodness-of-fit on <i>F</i> <sup>2</sup>  | 1.027                                           |
| Final <i>R</i> indexes                    | <i>R</i> <sub>1</sub> = 0.0752                  |
| Final <i>R</i> indexes                    | <i>R</i> <sub>1</sub> = 0.1257                  |
| Largest peak/hole [eÅ <sup>-3</sup> ]     | 0.34/-0.27                                      |

**Table S2.** Atomic coordinates and  $U_{eq}$  [ $\text{\AA}^2$ ] for **DASA-MA**.

| Atom | x         | y           | z          | $U_{eq}$   |
|------|-----------|-------------|------------|------------|
| C12  | 0.9418(4) | 0.40329(16) | 0.8694(5)  | 0.0409(9)  |
| C11  | 0.9046(4) | 0.43328(16) | 0.7143(5)  | 0.0413(9)  |
| H11  | 0.941062  | 0.418721    | 0.616227   | 0.050      |
| C13  | 1.0132(4) | 0.35253(17) | 0.8531(5)  | 0.0422(9)  |
| N1   | 0.6427(3) | 0.60183(13) | 0.1970(4)  | 0.0432(8)  |
| C7   | 0.7139(4) | 0.56009(16) | 0.2713(5)  | 0.0433(9)  |
| H7   | 0.761826  | 0.538571    | 0.197223   | 0.052      |
| C10  | 0.8260(4) | 0.47962(16) | 0.6751(5)  | 0.0442(9)  |
| C9   | 0.8049(4) | 0.49927(17) | 0.5027(5)  | 0.0429(9)  |
| H9   | 0.848057  | 0.480263    | 0.417817   | 0.052      |
| C15  | 0.9278(4) | 0.42212(17) | 1.0428(5)  | 0.0449(9)  |
| C1   | 0.5702(4) | 0.63856(17) | 0.2977(5)  | 0.0448(9)  |
| O1   | 1.0526(3) | 0.32243(11) | 1.0022(4)  | 0.0457(7)  |
| C8   | 0.7262(4) | 0.54423(17) | 0.4471(6)  | 0.0458(9)  |
| H8   | 0.680700  | 0.564224    | 0.527589   | 0.055      |
| C2   | 0.6325(4) | 0.68667(17) | 0.3600(6)  | 0.0494(10) |
| H2   | 0.721803  | 0.695463    | 0.336397   | 0.059      |
| C14  | 0.9864(4) | 0.33171(17) | 1.1523(6)  | 0.0487(10) |
| O2   | 0.9707(3) | 0.38921(12) | 1.1816(4)  | 0.0504(7)  |
| C16  | 0.6540(4) | 0.61765(18) | 0.0129(6)  | 0.0505(10) |
| H16A | 0.710675  | 0.590106    | -0.037756  | 0.061      |
| H16B | 0.701896  | 0.653275    | 0.013800   | 0.061      |
| O5   | 0.8844(3) | 0.46759(12) | 1.0827(4)  | 0.0534(8)  |
| C3   | 0.5631(5) | 0.72202(18) | 0.4575(6)  | 0.0551(11) |
| H3   | 0.606062  | 0.754689    | 0.504248   | 0.066      |
| O4   | 1.0463(3) | 0.33456(13) | 0.7174(4)  | 0.0564(8)  |
| O3   | 0.7615(3) | 0.50708(13) | 0.7937(4)  | 0.0572(8)  |
| H3A  | 0.789446  | 0.495401    | 0.895140   | 0.086      |
| C17  | 0.5177(5) | 0.62234(19) | -0.1043(6) | 0.0562(11) |
| H17A | 0.458081  | 0.647766    | -0.049498  | 0.067      |
| H17B | 0.532701  | 0.638207    | -0.218314  | 0.067      |
| C6   | 0.4389(4) | 0.6263(2)   | 0.3274(7)  | 0.0577(12) |
| H6   | 0.396307  | 0.593372    | 0.282299   | 0.069      |
| C4   | 0.4325(5) | 0.7098(2)   | 0.4864(6)  | 0.0581(12) |
| H4   | 0.384865  | 0.734640    | 0.551096   | 0.070      |
| C19  | 1.0817(6) | 0.3102(2)   | 1.3048(6)  | 0.0618(12) |
| H19A | 1.044181  | 0.317726    | 1.413554   | 0.093      |
| H19B | 1.170917  | 0.328047    | 1.309181   | 0.093      |
| H19C | 1.092453  | 0.270538    | 1.291778   | 0.093      |
| C20  | 0.8479(5) | 0.3042(2)   | 1.1251(7)  | 0.0617(12) |
| H20A | 0.800071  | 0.312009    | 1.225483   | 0.093      |
| H20B | 0.859849  | 0.264602    | 1.114568   | 0.093      |
| H20C | 0.794098  | 0.318309    | 1.017640   | 0.093      |
| C5   | 0.3695(5) | 0.6621(2)   | 0.4231(7)  | 0.0648(13) |
| H5   | 0.279356  | 0.653854    | 0.444728   | 0.078      |
| C18  | 0.4459(5) | 0.5684(2)   | -0.1362(7) | 0.0647(13) |
| H18A | 0.360925  | 0.573524    | -0.217285  | 0.097      |
| H18B | 0.424516  | 0.553681    | -0.024806  | 0.097      |
| H18C | 0.505289  | 0.542636    | -0.187471  | 0.097      |

$U_{eq}$  is defined as 1/3 of the trace of the orthogonalized  $U_{ij}$  tensor.

**Table S3.** Bond lengths and angles for **DASA-MA**.

|           |            |                       |                  |
|-----------|------------|-----------------------|------------------|
| Atom–Atom | Length [Å] | C20–H20C              | 0.9800           |
| C12–C11   | 1.405(6)   | C5–H5                 | 0.9500           |
| C12–C15   | 1.437(7)   | C18–H18A              | 0.9800           |
| C12–C13   | 1.440(6)   | C18–H18B              | 0.9800           |
| C11–C10   | 1.381(6)   | C18–H18C              | 0.9800           |
| C11–H11   | 0.9500     |                       |                  |
| C13–O4    | 1.220(6)   | <b>Atom–Atom–Atom</b> | <b>Angle [°]</b> |
| C13–O1    | 1.372(5)   | C11–C12–C15           | 125.1(4)         |
| N1–C7     | 1.321(5)   | C11–C12–C13           | 116.5(4)         |
| N1–C1     | 1.441(6)   | C15–C12–C13           | 118.0(3)         |
| N1–C16    | 1.489(7)   | C10–C11–C12           | 133.1(4)         |
| C7–C8     | 1.397(7)   | C10–C11–H11           | 113.4            |
| C7–H7     | 0.9500     | C12–C11–H11           | 113.4            |
| C10–O3    | 1.361(5)   | O4–C13–O1             | 116.4(4)         |
| C10–C9    | 1.399(7)   | O4–C13–C12            | 125.3(4)         |
| C9–C8     | 1.378(6)   | O1–C13–C12            | 118.2(4)         |
| C9–H9     | 0.9500     | C7–N1–C1              | 121.4(4)         |
| C15–O5    | 1.244(5)   | C7–N1–C16             | 120.4(4)         |
| C15–O2    | 1.356(5)   | C1–N1–C16             | 117.4(3)         |
| C1–C2     | 1.380(6)   | N1–C7–C8              | 127.0(4)         |
| C1–C6     | 1.380(7)   | N1–C7–H7              | 116.5            |
| O1–C14    | 1.425(6)   | C8–C7–H7              | 116.5            |
| C8–H8     | 0.9500     | O3–C10–C11            | 124.0(4)         |
| C2–C3     | 1.387(7)   | O3–C10–C9             | 116.6(4)         |
| C2–H2     | 0.9500     | C11–C10–C9            | 119.4(4)         |
| C14–O2    | 1.434(6)   | C8–C9–C10             | 124.7(4)         |
| C14–C19   | 1.492(7)   | C8–C9–H9              | 117.7            |
| C14–C20   | 1.510(7)   | C10–C9–H9             | 117.7            |
| C16–C17   | 1.514(7)   | O5–C15–O2             | 114.5(4)         |
| C16–H16A  | 0.9900     | O5–C15–C12            | 126.6(4)         |
| C16–H16B  | 0.9900     | O2–C15–C12            | 118.8(4)         |
| C3–C4     | 1.373(8)   | C2–C1–C6              | 120.7(4)         |
| C3–H3     | 0.9500     | C2–C1–N1              | 119.1(4)         |
| O3–H3A    | 0.8400     | C6–C1–N1              | 120.3(4)         |
| C17–C18   | 1.500(7)   | C13–O1–C14            | 119.0(3)         |
| C17–H17A  | 0.9900     | C9–C8–C7              | 119.3(4)         |
| C17–H17B  | 0.9900     | C9–C8–H8              | 120.4            |
| C6–C5     | 1.387(7)   | C7–C8–H8              | 120.4            |
| C6–H6     | 0.9500     | C1–C2–C3              | 119.2(4)         |
| C4–C5     | 1.377(7)   | C1–C2–H2              | 120.4            |
| C4–H4     | 0.9500     | C3–C2–H2              | 120.4            |
| C19–H19A  | 0.9800     | O1–C14–O2             | 110.9(3)         |
| C19–H19B  | 0.9800     | O1–C14–C19            | 105.8(4)         |
| C19–H19C  | 0.9800     | O2–C14–C19            | 107.0(4)         |
| C20–H20A  | 0.9800     | O1–C14–C20            | 109.1(4)         |
| C20–H20B  | 0.9800     | O2–C14–C20            | 109.9(4)         |

|               |          |               |          |
|---------------|----------|---------------|----------|
| C19–C14–C20   | 114.2(4) | C5–C4–H4      | 119.5    |
| C15–O2–C14    | 119.0(3) | C14–C19–H19A  | 109.5    |
| N1–C16–C17    | 114.0(4) | C14–C19–H19B  | 109.5    |
| N1–C16–H16A   | 108.8    | H19A–C19–H19B | 109.5    |
| C17–C16–H16A  | 108.8    | C14–C19–H19C  | 109.5    |
| N1–C16–H16B   | 108.8    | H19A–C19–H19C | 109.5    |
| C17–C16–H16B  | 108.8    | H19B–C19–H19C | 109.5    |
| H16A–C16–H16B | 107.6    | C14–C20–H20A  | 109.5    |
| C4–C3–C2      | 120.0(4) | C14–C20–H20B  | 109.5    |
| C4–C3–H3      | 120.0    | H20A–C20–H20B | 109.5    |
| C2–C3–H3      | 120.0    | C14–C20–H20C  | 109.5    |
| C10–O3–H3A    | 109.5    | H20A–C20–H20C | 109.5    |
| C18–C17–C16   | 113.0(4) | H20B–C20–H20C | 109.5    |
| C18–C17–H17A  | 109.0    | C4–C5–C6      | 119.3(5) |
| C16–C17–H17A  | 109.0    | C4–C5–H5      | 120.4    |
| C18–C17–H17B  | 109.0    | C6–C5–H5      | 120.4    |
| C16–C17–H17B  | 109.0    | C17–C18–H18A  | 109.5    |
| H17A–C17–H17B | 107.8    | C17–C18–H18B  | 109.5    |
| C1–C6–C5      | 119.9(4) | H18A–C18–H18B | 109.5    |
| C1–C6–H6      | 120.1    | C17–C18–H18C  | 109.5    |
| C5–C6–H6      | 120.1    | H18A–C18–H18C | 109.5    |
| C3–C4–C5      | 120.9(4) | H18B–C18–H18C | 109.5    |
| C3–C4–H4      | 119.5    |               |          |

**Table S4.** Torsion angles for **DASA-MA**.

|                     |                          |                |           |
|---------------------|--------------------------|----------------|-----------|
| Atom–Atom–Atom–Atom | <b>Torsion Angle [°]</b> | C10–C9–C8–C7   | 179.5(4)  |
| C15–C12–C11–C10     | –14.6(7)                 | N1–C7–C8–C9    | 179.9(4)  |
| C13–C12–C11–C10     | 172.7(4)                 | C6–C1–C2–C3    | 1.8(7)    |
| C11–C12–C13–O4      | 1.9(6)                   | N1–C1–C2–C3    | –179.8(4) |
| C15–C12–C13–O4      | –171.3(4)                | C13–O1–C14–O2  | –43.8(5)  |
| C11–C12–C13–O1      | 179.2(3)                 | C13–O1–C14–C19 | –159.4(3) |
| C15–C12–C13–O1      | 6.0(5)                   | C13–O1–C14–C20 | 77.4(5)   |
| C1–N1–C7–C8         | 2.4(6)                   | O5–C15–O2–C14  | 162.9(4)  |
| C16–N1–C7–C8        | 172.2(4)                 | C12–C15–O2–C14 | –20.0(5)  |
| C12–C11–C10–O3      | –1.1(7)                  | O1–C14–O2–C15  | 43.8(5)   |
| C12–C11–C10–C9      | –178.4(4)                | C19–C14–O2–C15 | 158.6(4)  |
| O3–C10–C9–C8        | 0.9(6)                   | C20–C14–O2–C15 | –76.9(5)  |
| C11–C10–C9–C8       | 178.5(4)                 | C7–N1–C16–C17  | 127.8(4)  |
| C11–C12–C15–O5      | –1.8(7)                  | C1–N1–C16–C17  | –61.9(5)  |
| C13–C12–C15–O5      | 170.7(4)                 | C1–C2–C3–C4    | –2.0(7)   |
| C11–C12–C15–O2      | –178.6(4)                | N1–C16–C17–C18 | –67.0(5)  |
| C13–C12–C15–O2      | –6.0(5)                  | C2–C1–C6–C5    | –1.1(7)   |
| C7–N1–C1–C2         | 95.3(5)                  | N1–C1–C6–C5    | –179.4(4) |
| C16–N1–C1–C2        | –74.8(5)                 | C2–C3–C4–C5    | 1.4(7)    |
| C7–N1–C1–C6         | –86.3(5)                 | C3–C4–C5–C6    | –0.6(8)   |
| C16–N1–C1–C6        | 103.6(5)                 | C1–C6–C5–C4    | 0.4(8)    |
| O4–C13–O1–C14       | –162.3(4)                |                |           |
| C12–C13–O1–C14      | 20.1(5)                  |                |           |



**Table S5.** Hydrogen bonds for **DASA-MA**.

| D–H···A [Å]                 | d(D–H) [Å] | d(H···A) [Å] | d(D···A) [Å] | <(DHA) [°] |
|-----------------------------|------------|--------------|--------------|------------|
| C7–H7···O5 <sup>#1</sup>    | 0.95       | 2.36         | 3.278(7)     | 163.4      |
| C2–H2···O4 <sup>#2</sup>    | 0.95       | 2.49         | 3.349(10)    | 149.8      |
| C16–H16A···O3 <sup>#1</sup> | 0.99       | 2.50         | 3.431(7)     | 157.4      |
| C16–H16B···O1 <sup>#2</sup> | 0.99       | 2.52         | 3.263(9)     | 132.1      |
| O3–H3A···O5                 | 0.84       | 1.74         | 2.566(6)     | 165.6      |
| C19–H19A···O4 <sup>#3</sup> | 0.98       | 2.37         | 3.299(10)    | 157.5      |
| C19–H19C···O4 <sup>#4</sup> | 0.98       | 2.66         | 3.605(8)     | 163.5      |

Symmetry transformations used to generate equivalent atoms:

#1: +X, +Y, -1+Z; #2: 2-X, 1-Y, 1-Z; #3: +X, +Y, 1+Z; #4: +X, 0.5-Y, 0.5+Z;

### 13. NMR data and mass spectrum of DASA-MA

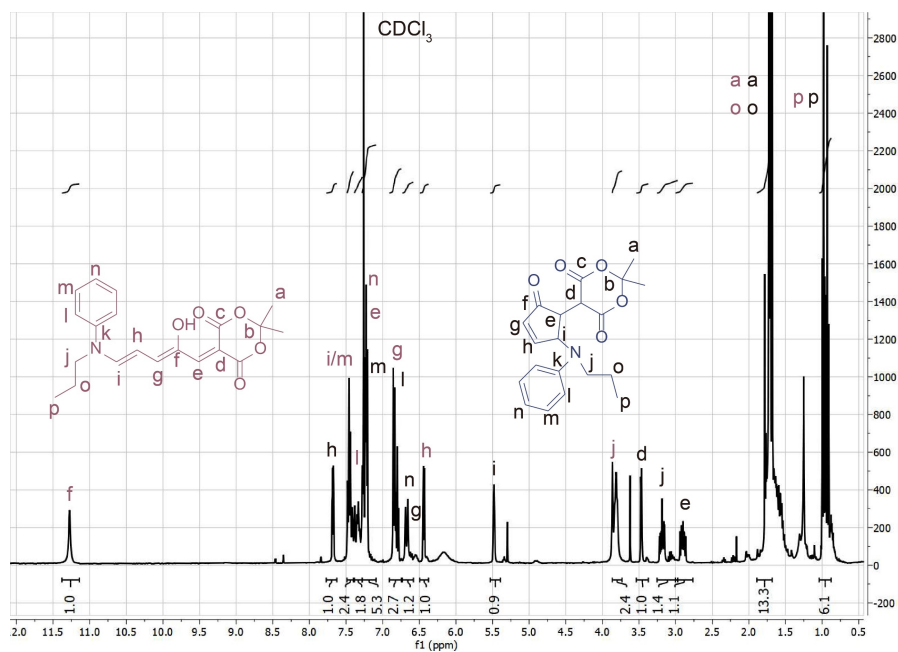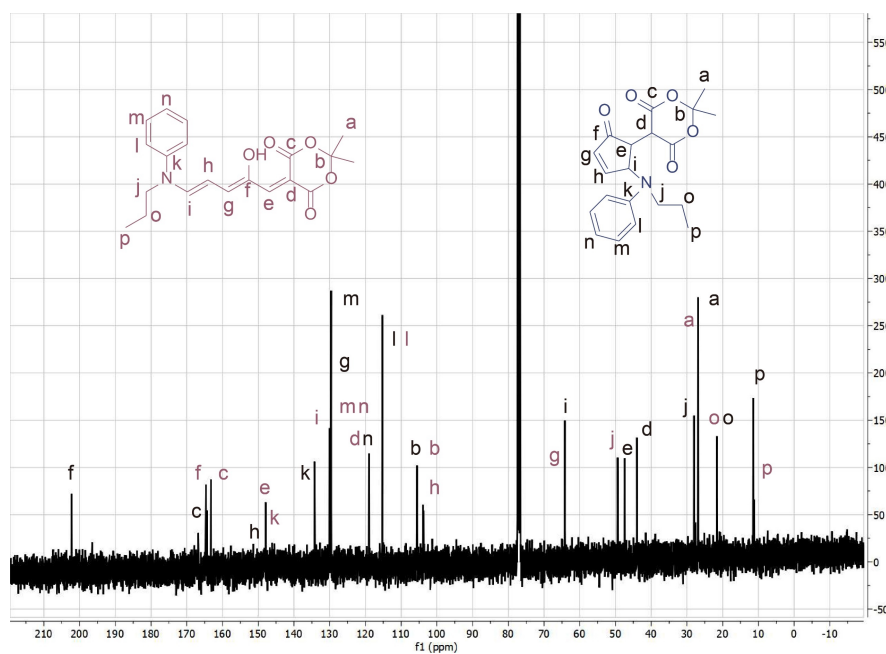

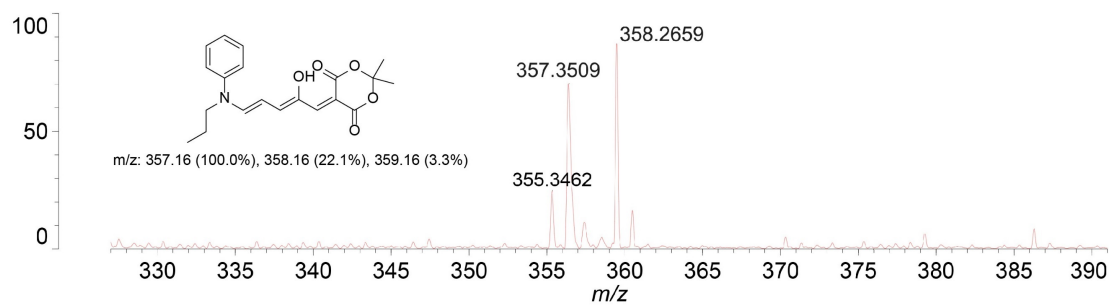

**Fig. S30.** Matrix-assisted laser ionization-time of flight (MALDI-TOF) mass spectrum of **DASA-MA**. m/z: M<sup>+</sup> calcd. for 357.16, found 357.35.

## 14. References

1. X. Xiong, F. Sun, A. Gao, Z. Wang, Y. Duan, Z. Yao, C. He, R. Han, X. Deng and Y. Zheng, *Chem. Eng. J.*, 2022, **450**, 138090.
2. F. Sun, X. Xiong, A. Gao, Y. Duan, L. Mao, L. Gu, Z. Wang, C. He, X. Deng and Y. Zheng, *Chem. Eng. J.*, 2022, **427**, 132037.
3. S. Helmy, F. A. Leibfarth, S. Oh, J. E. Poelma, C. J. Hawker and J. Read de Alaniz, *J. Am. Chem. Soc.*, 2014, **136**, 8169-8172.
4. M. M. Lerch, W. Szymański and B. L. Feringa, *Chem. Soc. Rev.*, 2018, **47**, 1910-1937.
5. J. R. Hemmer, S. O. Poelma, N. Treat, Z. A. Page, N. D. Dolinski, Y. J. Diaz, W. Tomlinson, K. D. Clark, J. P. Hooper and C. Hawker, *J. Am. Chem. Soc.*, 2016, **138**, 13960-13966.
6. N. Mallo, P. T. Brown, H. Iranmanesh, T. S. MacDonald, M. J. Teusner, J. B. Harper, G. E. Ball and J. E. Beves, *Chem. Commun.*, 2016, **52**, 13576-13579.
7. Gaussian 16, R. A., M. J. Frisch, G. W. Trucks, H. B. Schlegel, G. E. Scuseria, M. A. Robb, J. R. Cheeseman, G. Scalmani, V. Barone, G. A. Petersson, H. Nakatsuji, X. Li, M. Caricato, A. V. Marenich, J. Bloino, B. G. Janesko, R. Gomperts, B. Mennucci, H. P. Hratchian, J. V. Ortiz, A. F. Izmaylov, J. L. Sonnenberg, D. Williams-Young, F. Ding, F. Lipparini, F. Egidi, J. Goings, B. Peng, A. Petrone, T. Henderson, D. Ranasinghe, V. G. Zakrzewski, J. Gao, N. Rega, G. Zheng, W. Liang, M. Hada, M. Ehara, K. Toyota, R. Fukuda, J. Hasegawa, M. Ishida, T. Nakajima, Y. Honda, O. Kitao, H. Nakai, T. Vreven, K. Throssell, J. A. Montgomery, Jr., J. E. Peralta, F. Ogliaro, M. J. Bearpark, J. J. Heyd, E. N. Brothers, K. N. Kudin, V. N. Staroverov, T. A. Keith, R. Kobayashi, J. Normand, K. Raghavachari, A. P. Rendell, J. C. Burant, S. S. Iyengar, J. Tomasi, M. Cossi, J. M. Millam, M. Klene, C. Adamo, R. Cammi, J. W. Ochterski, R. L. Martin, K. Morokuma, O. Farkas, J. B. Foresman, and D. J. Fox, Gaussian, Inc., Wallingford CT., 2016.
8. P. J. Stephens, F. J. Devlin, C. F. Chabalowski, M. J. Frisch, *J. Phys. Chem.* 1994, **98**, 11623-11627.
9. A. Schaefer, H. Horn, and R. Ahlrichs, *J. Chem. Phys.*, 1992, **97**, 2571-77.
10. A. Schaefer, C. Huber, and R. Ahlrichs, *J. Chem. Phys.*, 1994, **100**, 5829-35.

## 15. Calculated geometries:

### In air

|   |          |          |          |
|---|----------|----------|----------|
| C | -2.04304 | 0.51654  | 1.09125  |
| C | -2.26302 | -0.65973 | 0.23275  |
| C | -3.61306 | -0.96467 | -0.2208  |
| O | -4.57232 | -0.03377 | 0.02901  |
| C | -4.18804 | 1.31812  | 0.32571  |
| O | -3.1134  | 1.35232  | 1.26857  |
| O | -1.0085  | 0.78557  | 1.65974  |
| O | -3.97969 | -2.00211 | -0.7486  |
| C | -5.38096 | 1.94929  | 1.01635  |
| C | -3.78412 | 2.0351   | -0.96017 |
| C | -1.12908 | -1.43118 | -0.0081  |
| C | -0.86687 | -2.61797 | -0.73066 |
| C | 0.44113  | -3.09386 | -0.83112 |
| O | -1.81211 | -3.40695 | -1.29003 |
| C | 1.6701   | -2.42835 | -0.60101 |
| C | 1.86919  | -1.07098 | -0.71445 |
| N | 3.00523  | -0.37808 | -0.44767 |
| C | 2.99961  | 1.05167  | -0.55168 |
| C | 4.18205  | -1.03651 | 0.13869  |
| C | 4.06606  | -1.24602 | 1.65423  |
| C | 5.30348  | -1.93544 | 2.23202  |
| C | 1.97829  | 1.79766  | 0.04548  |
| C | 1.97715  | 3.18598  | -0.07142 |
| C | 2.993    | 3.8388   | -0.76515 |
| C | 4.0143   | 3.09346  | -1.35296 |
| C | 4.018    | 1.7059   | -1.25313 |
| H | -5.6147  | 1.38879  | 1.92178  |
| H | -5.15335 | 2.98107  | 1.28754  |
| H | -6.24887 | 1.93349  | 0.35578  |
| H | -3.51741 | 3.07001  | -0.73944 |
| H | -2.92521 | 1.55054  | -1.42872 |
| H | -4.61353 | 2.02482  | -1.66919 |
| H | -0.26353 | -1.05263 | 0.51848  |
| H | 0.50543  | -4.13486 | -1.14193 |
| H | 4.3427   | -1.98837 | -0.37487 |
| H | 5.05129  | -0.41597 | -0.08125 |
| H | 3.9198   | -0.27249 | 2.13294  |
| H | 3.17081  | -1.83542 | 1.87251  |
| H | 5.20778  | -2.07043 | 3.31179  |
| H | 5.45704  | -2.92535 | 1.79099  |

|   |          |          |          |
|---|----------|----------|----------|
| H | 6.21112  | -1.35026 | 2.05409  |
| H | 1.19677  | 1.3073   | 0.61652  |
| H | 1.18207  | 3.75326  | 0.40079  |
| H | 2.99136  | 4.92054  | -0.84726 |
| H | 4.80499  | 3.5918   | -1.90425 |
| H | 4.796    | 1.12884  | -1.74147 |
| H | -2.70621 | -3.04045 | -1.10811 |
| H | 2.5194   | -3.06818 | -0.38241 |
| H | 1.07282  | -0.45673 | -1.11531 |

### GTA

|   |          |          |          |
|---|----------|----------|----------|
| C | -1.11423 | 3.66001  | -1.95161 |
| O | -0.80048 | 3.54255  | -3.35172 |
| C | -0.85354 | 5.0836   | -1.48518 |
| C | -2.56307 | 3.23547  | -1.80878 |
| C | 0.48018  | 3.30415  | -3.69897 |
| C | 0.63236  | 3.26998  | -5.18658 |
| O | -1.60411 | 6.02142  | -2.27589 |
| C | -0.96697 | 6.585    | -3.33343 |
| C | -1.92097 | 7.40845  | -4.1482  |
| O | 0.20368  | 6.42274  | -3.57401 |
| O | 1.36088  | 3.12719  | -2.88617 |
| O | -2.68502 | 1.85792  | -2.18325 |
| C | -3.27913 | 1.58218  | -3.38653 |
| C | -3.1598  | 0.12567  | -3.71345 |
| O | -3.8039  | 2.4221   | -4.06889 |
| H | -0.46689 | 2.99269  | -1.38415 |
| H | -1.19325 | 5.21129  | -0.4578  |
| H | 0.20689  | 5.31077  | -1.55408 |
| H | -2.86622 | 3.31027  | -0.76409 |
| H | -3.21313 | 3.84943  | -2.42837 |
| H | 0.07756  | 4.09142  | -5.63628 |
| H | 1.68247  | 3.32619  | -5.45542 |
| H | 0.22336  | 2.33164  | -5.56482 |
| H | -2.5695  | 6.73313  | -4.71097 |
| H | -2.55641 | 8.01595  | -3.50476 |
| H | -1.36418 | 8.03416  | -4.84047 |
| H | -3.25414 | -0.48711 | -2.8184  |
| H | -3.91699 | -0.14173 | -4.44638 |
| H | -2.1692  | -0.06326 | -4.13615 |
| C | -1.26296 | -2.91887 | -0.61637 |
| C | 0.1208   | -2.90667 | -0.21439 |
| C | 0.50604  | -3.50087 | 1.06963  |

|   |          |          |          |
|---|----------|----------|----------|
| O | -0.52083 | -3.97484 | 1.85097  |
| C | -1.81207 | -3.40408 | 1.67455  |
| O | -2.16996 | -3.38108 | 0.27834  |
| O | -1.69511 | -2.56068 | -1.71614 |
| O | 1.63902  | -3.63908 | 1.46494  |
| C | -1.84825 | -1.98543 | 2.22462  |
| C | -2.79863 | -4.33223 | 2.34426  |
| C | 1.16388  | -2.34752 | -0.94999 |
| C | 1.2753   | -1.89511 | -2.27613 |
| C | 2.43674  | -1.23706 | -2.68572 |
| O | 0.34798  | -2.14827 | -3.23558 |
| C | 3.33683  | -0.56483 | -1.8514  |
| C | 2.96454  | -0.06709 | -0.61796 |
| N | 3.76637  | 0.48102  | 0.31196  |
| C | 5.18203  | 0.34121  | 0.29143  |
| C | 3.12935  | 1.26307  | 1.38783  |
| C | 2.60262  | 2.62224  | 0.93265  |
| C | 1.92437  | 3.36489  | 2.07972  |
| C | 6.00281  | 1.45553  | 0.46086  |
| C | 7.38451  | 1.30338  | 0.47491  |
| C | 7.95472  | 0.04622  | 0.31294  |
| C | 7.13275  | -1.06544 | 0.14762  |
| C | 5.7527   | -0.92394 | 0.14252  |
| H | -1.10471 | -1.36066 | 1.72931  |
| H | -2.83519 | -1.55706 | 2.05552  |
| H | -1.63155 | -2.00556 | 3.29243  |
| H | -3.80974 | -3.94561 | 2.22217  |
| H | -2.73419 | -5.321   | 1.89303  |
| H | -2.56691 | -4.40778 | 3.40576  |
| H | 2.09879  | -2.33658 | -0.40652 |
| H | 2.61981  | -1.22325 | -3.75547 |
| H | -0.50099 | -2.41674 | -2.80552 |
| H | 4.33733  | -0.366   | -2.21668 |
| H | 1.91166  | -0.02407 | -0.36411 |
| H | 2.30096  | 0.66811  | 1.77878  |
| H | 3.86234  | 1.37366  | 2.1859   |
| H | 3.42172  | 3.22157  | 0.52667  |
| H | 1.88688  | 2.473    | 0.12317  |
| H | 1.4842   | 4.2983   | 1.72896  |
| H | 1.12357  | 2.75761  | 2.50827  |
| H | 2.63058  | 3.59696  | 2.88106  |
| H | 5.56388  | 2.43766  | 0.57038  |
| H | 8.01508  | 2.17389  | 0.60374  |
| H | 9.0308   | -0.06882 | 0.32069  |

|   |         |          |         |
|---|---------|----------|---------|
| H | 7.56677 | -2.05108 | 0.03813 |
| H | 5.11182 | -1.78884 | 0.03882 |

**HH**

|   |          |          |          |
|---|----------|----------|----------|
| C | 1.92061  | -0.89249 | -1.21187 |
| C | 0.56426  | -1.34644 | -0.97192 |
| C | 0.34871  | -2.60814 | -0.24923 |
| O | 1.45393  | -3.16892 | 0.33215  |
| C | 2.57004  | -2.32083 | 0.60654  |
| O | 2.90901  | -1.55702 | -0.56488 |
| O | 2.26209  | -0.01728 | -1.99434 |
| O | -0.71332 | -3.17757 | -0.14196 |
| C | 3.75103  | -3.22548 | 0.87127  |
| C | 2.25541  | -1.38586 | 1.76642  |
| C | -0.59281 | -0.71704 | -1.41051 |
| C | -0.85873 | 0.50456  | -2.05477 |
| C | -2.16935 | 0.95982  | -2.18107 |
| O | 0.09094  | 1.29632  | -2.60914 |
| C | -3.32113 | 0.54438  | -1.4885  |
| C | -3.31362 | -0.09836 | -0.27458 |
| N | -4.36963 | -0.61851 | 0.38111  |
| C | -5.64579 | -0.77603 | -0.23396 |
| C | -4.17794 | -1.07737 | 1.76663  |
| C | -4.03426 | 0.05239  | 2.78445  |
| C | -3.7957  | -0.48902 | 4.19166  |
| C | -6.77887 | -0.22002 | 0.35567  |
| C | -8.02578 | -0.40526 | -0.23114 |
| C | -8.14455 | -1.13369 | -1.40901 |
| C | -7.00954 | -1.6858  | -1.99691 |
| C | -5.76304 | -1.51382 | -1.41145 |
| H | 3.92763  | -3.85852 | 0.00328  |
| H | 4.63932  | -2.62538 | 1.06513  |
| H | 3.54452  | -3.85335 | 1.73679  |
| H | 3.1077   | -0.73904 | 1.96245  |
| H | 1.4003   | -0.75155 | 1.53751  |
| H | 2.03092  | -1.9767  | 2.65376  |
| H | -1.47482 | -1.30884 | -1.21671 |
| H | -2.29583 | 1.76964  | -2.89285 |
| H | 0.97419  | 0.85562  | -2.5321  |
| H | -4.27948 | 0.8062   | -1.92025 |
| H | -2.38434 | -0.17677 | 0.27394  |
| H | -5.02843 | -1.71041 | 2.01552  |
| H | -3.28738 | -1.71346 | 1.78481  |



|   |          |          |          |
|---|----------|----------|----------|
| H | -3.20585 | 0.69941  | 2.48741  |
| H | -4.93097 | 0.67655  | 2.76719  |
| H | -3.68748 | 0.32451  | 4.91011  |
| H | -4.62699 | -1.11659 | 4.52204  |
| H | -2.88664 | -1.09362 | 4.23315  |
| H | -6.68261 | 0.36331  | 1.26141  |
| H | -8.90308 | 0.03041  | 0.2297   |
| H | -9.11554 | -1.27308 | -1.86623 |
| H | -7.0961  | -2.26391 | -2.90799 |
| H | -4.87905 | -1.95299 | -1.85397 |
| C | 9.07818  | 2.74546  | -1.90702 |
| C | 7.66455  | 2.18448  | -2.0477  |
| C | 6.66317  | 3.21149  | -2.57376 |
| C | 5.24631  | 2.65861  | -2.71504 |
| C | 4.27371  | 3.70538  | -3.24157 |
| C | 2.84956  | 3.21836  | -3.33655 |
| O | 2.07096  | 4.12245  | -3.97398 |
| C | 0.65678  | 3.82446  | -4.00232 |
| C | -0.05436 | 4.97671  | -4.67799 |
| C | -1.56848 | 4.77128  | -4.69325 |
| C | -2.31708 | 5.90978  | -5.38156 |
| C | -3.836   | 5.78754  | -5.281   |
| C | -4.57779 | 6.96277  | -5.91451 |
| O | 2.43138  | 2.17471  | -2.90167 |
| H | 9.77281  | 1.99219  | -1.52959 |
| H | 9.45935  | 3.09704  | -2.86952 |
| H | 9.09766  | 3.59191  | -1.21549 |
| H | 7.31908  | 1.81181  | -1.07802 |
| H | 7.67755  | 1.31941  | -2.71889 |
| H | 7.00952  | 3.58575  | -3.54498 |
| H | 6.64861  | 4.0774   | -1.90124 |
| H | 4.89006  | 2.29499  | -1.74861 |
| H | 5.25038  | 1.79122  | -3.38117 |
| H | 4.57802  | 4.06709  | -4.22834 |
| H | 4.25591  | 4.58052  | -2.58692 |
| H | 0.5021   | 2.88586  | -4.53809 |
| H | 0.30744  | 3.69017  | -2.97869 |
| H | 0.18027  | 5.90109  | -4.14364 |
| H | 0.32451  | 5.09185  | -5.69831 |
| H | -1.80812 | 3.82566  | -5.19196 |
| H | -1.92026 | 4.67747  | -3.66214 |
| H | -2.0106  | 6.85743  | -4.93154 |
| H | -2.02233 | 5.96135  | -6.43624 |
| H | -4.15501 | 4.85172  | -5.7513  |

|   |          |         |          |
|---|----------|---------|----------|
| H | -4.11453 | 5.70961 | -4.2256  |
| H | -5.66012 | 6.82992 | -5.85792 |
| H | -4.33073 | 7.89698 | -5.40632 |
| H | -4.31052 | 7.07658 | -6.96863 |

**HB**

|   |          |          |          |
|---|----------|----------|----------|
| C | -1.83318 | 0.83286  | -1.44038 |
| C | -0.50618 | 1.3667   | -1.18591 |
| C | -0.38162 | 2.68516  | -0.54461 |
| O | -1.53946 | 3.22638  | -0.05519 |
| C | -2.60652 | 2.33172  | 0.26716  |
| O | -2.87188 | 1.45934  | -0.84808 |
| O | -2.1006  | -0.10098 | -2.18431 |
| O | 0.64493  | 3.31513  | -0.44159 |
| C | -3.85016 | 3.16884  | 0.44432  |
| C | -2.25238 | 1.50991  | 1.49834  |
| C | 0.69198  | 0.75873  | -1.52692 |
| C | 1.0305   | -0.45617 | -2.15924 |
| C | 2.35717  | -0.87253 | -2.20424 |
| O | 0.14391  | -1.24918 | -2.80543 |
| C | 3.43222  | -0.4456  | -1.40278 |
| C | 3.28887  | 0.11553  | -0.15909 |
| N | 4.25691  | 0.63924  | 0.62385  |
| C | 5.55725  | 0.94785  | 0.13618  |
| C | 3.93602  | 0.89611  | 2.03606  |
| C | 3.8165   | -0.36792 | 2.88569  |
| C | 3.45664  | -0.04053 | 4.33243  |
| C | 6.68717  | 0.51875  | 0.83136  |
| C | 7.95505  | 0.85721  | 0.37241  |
| C | 8.10417  | 1.61302  | -0.78426 |
| C | 6.97433  | 2.0396   | -1.47746 |
| C | 5.70529  | 1.71568  | -1.01994 |
| H | -4.04981 | 3.722    | -0.47195 |
| H | -4.69757 | 2.52401  | 0.66786  |
| H | -3.70417 | 3.87202  | 1.26316  |
| H | -3.06077 | 0.81846  | 1.71861  |
| H | -1.34231 | 0.93356  | 1.33579  |
| H | -2.09873 | 2.17887  | 2.34443  |
| H | 1.5475   | 1.37155  | -1.28067 |
| H | 2.56457  | -1.65168 | -2.93085 |
| H | -0.76394 | -0.85811 | -2.731   |
| H | 4.43456  | -0.63533 | -1.76755 |
| H | 2.31283  | 0.1046   | 0.30909  |

|   |          |          |           |
|---|----------|----------|-----------|
| H | 4.70947  | 1.55361  | 2.43013   |
| H | 2.99527  | 1.45468  | 2.06642   |
| H | 3.05689  | -1.02068 | 2.44978   |
| H | 4.75577  | -0.925   | 2.84597   |
| H | 3.36242  | -0.94962 | 4.92776   |
| H | 4.22005  | 0.58619  | 4.79995   |
| H | 2.50613  | 0.49542  | 4.3909    |
| H | 6.57605  | -0.08575 | 1.72122   |
| H | 8.82712  | 0.5186   | 0.91719   |
| H | 9.09213  | 1.87178  | -1.1422   |
| H | 7.08033  | 2.64126  | -2.3711   |
| H | 4.82586  | 2.06354  | -1.54444  |
| C | -3.68064 | -3.79546 | -3.32239  |
| C | -3.90413 | -3.53979 | -1.96996  |
| C | -4.93178 | -4.18903 | -1.29993  |
| C | -5.75411 | -5.08283 | -1.98111  |
| C | -5.54324 | -5.32809 | -3.33458  |
| C | -4.50443 | -4.69196 | -4.00348  |
| C | -2.57271 | -3.06704 | -4.00269  |
| O | -2.12582 | -3.73092 | -5.08891  |
| C | -1.03146 | -3.11712 | -5.81055  |
| C | -0.41756 | -4.17133 | -6.70661  |
| C | 0.75018  | -3.61804 | -7.52237  |
| C | 1.3973   | -4.67405 | -8.4159   |
| C | 2.63085  | -4.16723 | -9.1601   |
| C | 3.27757  | -5.22819 | -10.04828 |
| O | -2.13117 | -2.00809 | -3.63001  |
| H | -3.25967 | -2.83624 | -1.46083  |
| H | -5.0938  | -3.99797 | -0.24675  |
| H | -6.55922 | -5.58463 | -1.45899  |
| H | -6.18754 | -6.01552 | -3.86816  |
| H | -4.335   | -4.87554 | -5.05536  |
| H | -1.42613 | -2.27659 | -6.38647  |
| H | -0.31155 | -2.73358 | -5.09075  |
| H | -0.06509 | -4.998   | -6.08395  |
| H | -1.18527 | -4.57846 | -7.37204  |
| H | 0.40478  | -2.78247 | -8.14109  |
| H | 1.50208  | -3.21465 | -6.83898  |
| H | 1.6836   | -5.53102 | -7.79957  |
| H | 0.66133  | -5.04623 | -9.13862  |
| H | 2.35376  | -3.29839 | -9.76606  |
| H | 3.36165  | -3.80907 | -8.42861  |
| H | 4.14038  | -4.82798 | -10.5847  |
| H | 3.62049  | -6.07723 | -9.4539   |

|   |        |          |           |
|---|--------|----------|-----------|
| H | 2.5695 | -5.60506 | -10.79142 |
|---|--------|----------|-----------|

**TGD**

|   |          |          |          |
|---|----------|----------|----------|
| C | 0.50572  | -0.21423 | -1.74565 |
| C | -0.65217 | -1.0167  | -1.43454 |
| C | -0.48012 | -2.271   | -0.69322 |
| O | 0.7797   | -2.51688 | -0.20865 |
| C | 1.63847  | -1.40125 | 0.01273  |
| O | 1.67792  | -0.56215 | -1.16159 |
| O | 0.54139  | 0.74417  | -2.51239 |
| O | -1.34255 | -3.09632 | -0.50393 |
| C | 3.03581  | -1.95434 | 0.17579  |
| C | 1.15737  | -0.58502 | 1.20536  |
| C | -1.96507 | -0.69587 | -1.75868 |
| C | -2.56627 | 0.33359  | -2.50736 |
| C | -3.95472 | 0.4689   | -2.48534 |
| O | -1.89086 | 1.18747  | -3.31474 |
| C | -4.78307 | 0.03004  | -1.44296 |
| C | -4.29326 | -0.12788 | -0.16215 |
| N | -4.92178 | -0.67465 | 0.89414  |
| C | -6.09921 | -1.46454 | 0.76807  |
| C | -4.32485 | -0.46895 | 2.22444  |
| C | -4.48295 | 0.95448  | 2.75453  |
| C | -3.76642 | 1.13739  | 4.0896   |
| C | -7.21606 | -1.19112 | 1.55571  |
| C | -8.34896 | -1.99038 | 1.45315  |
| C | -8.37698 | -3.05609 | 0.5611   |
| C | -7.25885 | -3.32777 | -0.22308 |
| C | -6.12034 | -2.54145 | -0.11883 |
| H | 3.29039  | -2.55499 | -0.69597 |
| H | 3.75469  | -1.14179 | 0.26529  |
| H | 3.07907  | -2.58112 | 1.06563  |
| H | 1.82909  | 0.25397  | 1.3797   |
| H | 0.15668  | -0.18834 | 1.03081  |
| H | 1.13419  | -1.22161 | 2.08941  |
| H | -2.66913 | -1.42891 | -1.39243 |
| H | -4.40008 | 1.00741  | -3.31594 |
| H | -0.91667 | 1.05022  | -3.18573 |
| H | -5.83757 | -0.13059 | -1.63334 |
| H | -3.32218 | 0.29411  | 0.07186  |
| H | -4.78063 | -1.18966 | 2.90182  |
| H | -3.2623  | -0.71637 | 2.15149  |
| H | -4.07102 | 1.64736  | 2.01778  |

|   |           |          |          |
|---|-----------|----------|----------|
| H | -5.54544  | 1.1913   | 2.85725  |
| H | -3.88727  | 2.15529  | 4.46294  |
| H | -4.15671  | 0.45564  | 4.84948  |
| H | -2.69609  | 0.94611  | 3.98532  |
| H | -7.20161  | -0.35183 | 2.23801  |
| H | -9.2138   | -1.77176 | 2.06656  |
| H | -9.26111  | -3.67505 | 0.48044  |
| H | -7.26587  | -4.1662  | -0.90776 |
| H | -5.24031  | -2.76451 | -0.70684 |
| C | 2.22228   | 3.61443  | -3.9345  |
| C | 0.92857   | 3.24155  | -4.595   |
| O | 0.79483   | 3.85373  | -5.78681 |
| C | -0.45042  | 3.69341  | -6.49808 |
| C | -1.30293  | 4.93129  | -6.28921 |
| O | -2.54128  | 4.68533  | -6.93372 |
| C | -3.50056  | 5.70791  | -6.70263 |
| C | -4.80135  | 5.24304  | -7.3262  |
| O | -5.82491  | 6.11937  | -6.89016 |
| C | -7.09911  | 5.78169  | -7.40114 |
| C | -8.0849   | 6.77683  | -6.82826 |
| O | -9.37733  | 6.41038  | -7.34876 |
| C | -10.41831 | 7.18395  | -6.96119 |
| C | -11.7052  | 6.69627  | -7.5691  |
| O | 0.09348   | 2.50038  | -4.12202 |
| O | -10.30021 | 8.13068  | -6.22631 |
| H | 2.0524    | 4.52295  | -3.3509  |
| H | 2.52766   | 2.8263   | -3.25057 |
| H | 2.99665   | 3.81338  | -4.67244 |
| H | -0.18534  | 3.56895  | -7.54618 |
| H | -0.97108  | 2.8083   | -6.14028 |
| H | -1.44745  | 5.11472  | -5.22081 |
| H | -0.80898  | 5.81259  | -6.717   |
| H | -3.64144  | 5.86703  | -5.62943 |
| H | -3.17442  | 6.65442  | -7.14987 |
| H | -4.73021  | 5.2412   | -8.42107 |
| H | -5.01077  | 4.21485  | -7.00298 |
| H | -7.10621  | 5.82959  | -8.49775 |
| H | -7.379    | 4.76157  | -7.10633 |
| H | -8.09662  | 6.73514  | -5.73891 |
| H | -7.83639  | 7.79458  | -7.1292  |
| H | -11.63263 | 6.71236  | -8.65758 |
| H | -11.89167 | 5.66428  | -7.26832 |
| H | -12.52318 | 7.33203  | -7.24191 |
